# Supplementary material for: Recent shifts in the genomic ancestry of Mexican Americans may alter the genetic architecture of biomedical traits
Source: eLife. 2020 Dec 29;9:e56029. doi: 10.7554/eLife.56029 (PMC7771964; doi:10.7554/eLife.56029)
Supplement: Supplementary file 1. — For each population, we tested for an association between global ancestry and birth year while accounting for the sampling design. AI, AFR, and EUR refer to Amerindigenous, African, and European ancestry respectively. The significance threshold was set at 0.003 using Bonferroni correction for multiple testing (0.05/18). [file elife-56029-supp1.xlsx]

## Sheet: Sheet1
Population	Ancestry	N	R2	Effect	Std.Err	P
Central American	AI	1099	0.0139	0.0013	0.0004	0.0013
Central American	AFR	1099	0.0136	0.0002	0.0004	0.6561
Central American	EUR	1099	0.0138	-0.0015	0.0004	0.0002
Cuban	AI	1536	0.0023	0.0002	0.0001	0.0938
Cuban	AFR	1536	0.0014	-0.0005	0.0004	0.149
Cuban	EUR	1536	0.0005	0.0003	0.0004	0.3879
Dominican	AI	954	0.0035	0.0002	0.0001	0.0663
Dominican	AFR	954	0.003	-0.0007	0.0004	0.1287
Dominican	EUR	954	0.0022	0.0005	0.0004	0.2374
Mexican	AI	3622	0.0268	0.0023	0.0002	3.58e-22
Mexican	AFR	3622	0.0008	0	0	0.4189
Mexican	EUR	3622	0.0285	-0.0023	0.0002	9.18e-24
Puerto Rican	AI	1783	0.0014	0.0001	0.0001	0.1533
Puerto Rican	AFR	1783	0.0014	0.0003	0.0002	0.1743
Puerto Rican	EUR	1783	0.0027	-0.0005	0.0002	0.0355
South American	AI	652	0.011	0.0016	0.0007	0.0211
South American	AFR	652	0.0027	-0.0002	0.0004	0.5053
South American	EUR	652	0.008	-0.0014	0.0006	0.0335
