# Supplementary material for: Recent shifts in the genomic ancestry of Mexican Americans may alter the genetic architecture of biomedical traits
Source: eLife. 2020 Dec 29;9:e56029. doi: 10.7554/eLife.56029 (PMC7771964; doi:10.7554/eLife.56029)
Supplement: Supplementary file 2. — Recruitment was performed at four regions: Bronx, Chicago, Miami and San Diego. Education attainment was categorized as either less than a high school diploma or equivalent degree (<HS), equal to a high school diploma or equivalent degree (=HS), or post-secondary education (>HS). [file elife-56029-supp2.xlsx]

## Sheet: Sheet1
Decade	N	Bronx	Chicago	Miami	San Diego	NonUS	USborn	F	M	<HS	HS	>HS
1930	79	1	24	0	54	73	6	48	31	58	8	13
1940	437	6	129	0	302	393	44	273	164	251	58	127
1950	843	13	283	6	541	762	81	516	327	439	167	235
1960	996	23	364	3	606	888	107	578	418	368	263	364
1970	629	44	256	8	321	527	102	367	262	220	209	200
1980	508	35	222	8	243	308	200	271	237	145	195	168
1990	130	2	32	0	96	36	94	69	61	37	60	33
