# Supplementary material for: Recent shifts in the genomic ancestry of Mexican Americans may alter the genetic architecture of biomedical traits
Source: eLife. 2020 Dec 29;9:e56029. doi: 10.7554/eLife.56029 (PMC7771964; doi:10.7554/eLife.56029)
Supplement: Supplementary file 3. — Each trait as a function of AI ancestry adjusted by birth year, center, gender, sampling weight, educational attainment, US-born status, and number of US-born parents. Results are shown for both the raw data and quantile normalized data. [file elife-56029-supp3.xlsx]

## Sheet: Sheet1
Supplementary Table 3: Association of quantitative traits and Amerindigenous ancestry in HCHS/SOL Mexican Americans.
Trait ~ AI + birthyear + gender + log(sampling weight) + center +educational attainment + US born status + number of US born parents
	Raw Data							Quantile Normalized Data
	PHENO	COVARIATE	SLOPE	SE	P			PHENO	COVARIATE	SLOPE	SE	P
1	Mean SpO2	AI	-0.162475	0.104841	0.121299		1	Mean SpO2	AI	-8.5849	6.20671	0.166704
2	Mean SpO2	birth_year	0.0216192	0.00140007	4.72872e-52		2	Mean SpO2	birth_year	1.62025	0.0828862	9.39337e-81
3	Mean SpO2	GENDER	-0.37736	0.0314254	1.44207e-32		3	Mean SpO2	GENDER	-28.2736	1.86043	1.58841e-50
4	Mean SpO2	log(WEIGHT_FINAL_NORM_OVERALL)	-0.00591113	0.0215602	0.783972		4	Mean SpO2	log(WEIGHT_FINAL_NORM_OVERALL)	1.05264	1.27639	0.409599
5	Mean SpO2	CENTERC	0.018172	0.0895274	0.839165		5	Mean SpO2	CENTERC	8.52724	5.30014	0.107737
6	Mean SpO2	CENTERM	0.275254	0.208385	0.186625		6	Mean SpO2	CENTERM	36.8768	12.3366	0.00281689
7	Mean SpO2	CENTERS	0.0531114	0.0911492	0.560143		7	Mean SpO2	CENTERS	16.909	5.39616	0.00174182
8	Mean SpO2	Education2	0.0396054	0.0383301	0.30155		8	Mean SpO2	Education2	1.59568	2.26919	0.481983
9	Mean SpO2	Education3	0.00316763	0.0372997	0.932327		9	Mean SpO2	Education3	-1.82674	2.20819	0.408148
10	Mean SpO2	US_BORN	-0.0478047	0.0492763	0.332047		10	Mean SpO2	US_BORN	3.21954	2.91722	0.26983
11	Mean SpO2	num_us_parents	-0.00442791	0.0437159	0.919327		11	Mean SpO2	num_us_parents	-2.67459	2.58804	0.30147
12	Right brachial systolic blood pressure	AI	2.23591	2.83756	0.43081		12	Right brachial systolic blood pressure	AI	6.61379	8.57523	0.44064
13	Right brachial systolic blood pressure	birth_year	-0.748834	0.0555218	9.80979e-40		13	Right brachial systolic blood pressure	birth_year	-2.20408	0.167789	7.34641e-38
14	Right brachial systolic blood pressure	GENDER	0.140381	0.882626	0.873647		14	Right brachial systolic blood pressure	GENDER	0.715417	2.66733	0.788562
15	Right brachial systolic blood pressure	log(WEIGHT_FINAL_NORM_OVERALL)	0.0074311	0.658403	0.990996		15	Right brachial systolic blood pressure	log(WEIGHT_FINAL_NORM_OVERALL)	-0.135639	1.98972	0.945657
16	Right brachial systolic blood pressure	CENTERC	3.85711	3.31352	0.244542		16	Right brachial systolic blood pressure	CENTERC	10.4624	10.0136	0.296235
17	Right brachial systolic blood pressure	CENTERM	16.1407	6.93709	0.0200798		17	Right brachial systolic blood pressure	CENTERM	45.5481	20.9642	0.0299233
18	Right brachial systolic blood pressure	CENTERS	6.86259	3.32158	0.0389517		18	Right brachial systolic blood pressure	CENTERS	19.6494	10.0379	0.0504269
19	Right brachial systolic blood pressure	Education2	-1.24539	1.13341	0.271991		19	Right brachial systolic blood pressure	Education2	-4.39544	3.42522	0.199551
20	Right brachial systolic blood pressure	Education3	-3.45979	1.01379	0.000655995		20	Right brachial systolic blood pressure	Education3	-10.4158	3.0637	0.000687823
21	Right brachial systolic blood pressure	US_BORN	-3.19946	1.80077	0.0757678		21	Right brachial systolic blood pressure	US_BORN	-9.08208	5.442	0.0952975
22	Right brachial systolic blood pressure	num_us_parents	1.22509	1.25852	0.330453		22	Right brachial systolic blood pressure	num_us_parents	3.77135	3.8033	0.321513
23	Right dorsalis pedis systolic blood pressure	AI	3.21865	3.50075	0.357989		23	Right dorsalis pedis systolic blood pressure	AI	8.23581	8.50356	0.332905
24	Right dorsalis pedis systolic blood pressure	birth_year	-0.769422	0.0684945	1.9705e-28		24	Right dorsalis pedis systolic blood pressure	birth_year	-1.92191	0.166378	6.39405e-30
25	Right dorsalis pedis systolic blood pressure	GENDER	6.58864	1.09097	1.84322e-09		25	Right dorsalis pedis systolic blood pressure	GENDER	16.493	2.65004	5.90688e-10
26	Right dorsalis pedis systolic blood pressure	log(WEIGHT_FINAL_NORM_OVERALL)	-0.33969	0.815478	0.677051		26	Right dorsalis pedis systolic blood pressure	log(WEIGHT_FINAL_NORM_OVERALL)	-0.809368	1.98085	0.68288
27	Right dorsalis pedis systolic blood pressure	CENTERC	9.00359	4.08677	0.0277018		27	Right dorsalis pedis systolic blood pressure	CENTERC	22.4028	9.92703	0.0241323
28	Right dorsalis pedis systolic blood pressure	CENTERM	14.5229	8.55411	0.0897084		28	Right dorsalis pedis systolic blood pressure	CENTERM	35.6644	20.7785	0.086243
29	Right dorsalis pedis systolic blood pressure	CENTERS	10.3155	4.09676	0.0118817		29	Right dorsalis pedis systolic blood pressure	CENTERS	25.4384	9.95129	0.0106533
30	Right dorsalis pedis systolic blood pressure	Education2	-0.0931068	1.40076	0.947011		30	Right dorsalis pedis systolic blood pressure	Education2	0.0528785	3.40254	0.987602
31	Right dorsalis pedis systolic blood pressure	Education3	-2.12707	1.24938	0.0888185		31	Right dorsalis pedis systolic blood pressure	Education3	-4.81842	3.03483	0.112512
32	Right dorsalis pedis systolic blood pressure	US_BORN	-2.03599	2.23104	0.361576		32	Right dorsalis pedis systolic blood pressure	US_BORN	-5.14914	5.41933	0.342155
33	Right dorsalis pedis systolic blood pressure	num_us_parents	-0.276989	1.55162	0.858336		33	Right dorsalis pedis systolic blood pressure	num_us_parents	-0.667538	3.76897	0.859437
34	Right posterior tibial systolic blood pressure	AI	6.02276	3.51034	0.0863692		34	Right posterior tibial systolic blood pressure	AI	14.7603	8.39935	0.0790188
35	Right posterior tibial systolic blood pressure	birth_year	-0.735201	0.0687834	5.7541e-26		35	Right posterior tibial systolic blood pressure	birth_year	-1.79782	0.164581	5.12512e-27
36	Right posterior tibial systolic blood pressure	GENDER	7.20571	1.09477	5.92282e-11		36	Right posterior tibial systolic blood pressure	GENDER	17.5282	2.6195	2.8648e-11
37	Right posterior tibial systolic blood pressure	log(WEIGHT_FINAL_NORM_OVERALL)	-0.242907	0.817596	0.766421		37	Right posterior tibial systolic blood pressure	log(WEIGHT_FINAL_NORM_OVERALL)	-0.483416	1.9563	0.804851
38	Right posterior tibial systolic blood pressure	CENTERC	5.44512	4.09712	0.183997		38	Right posterior tibial systolic blood pressure	CENTERC	13.3786	9.80338	0.172504
39	Right posterior tibial systolic blood pressure	CENTERM	7.3016	8.57719	0.394716		39	Right posterior tibial systolic blood pressure	CENTERM	19.461	20.5231	0.343118
40	Right posterior tibial systolic blood pressure	CENTERS	7.86246	4.10775	0.0557568		40	Right posterior tibial systolic blood pressure	CENTERS	19.4945	9.82882	0.0474598
41	Right posterior tibial systolic blood pressure	Education2	-1.22633	1.40393	0.3825		41	Right posterior tibial systolic blood pressure	Education2	-2.91598	3.35926	0.385476
42	Right posterior tibial systolic blood pressure	Education3	-2.29768	1.25361	0.0669735		42	Right posterior tibial systolic blood pressure	Education3	-6.00306	2.99956	0.0454945
43	Right posterior tibial systolic blood pressure	US_BORN	-2.91364	2.22412	0.190341		43	Right posterior tibial systolic blood pressure	US_BORN	-7.22722	5.32177	0.174602
44	Right posterior tibial systolic blood pressure	num_us_parents	1.07818	1.5527	0.487519		44	Right posterior tibial systolic blood pressure	num_us_parents	2.85846	3.71521	0.441751
45	Left posterior tibial systolic blood pressure	AI	5.12951	3.63432	0.158281		45	Left posterior tibial systolic blood pressure	AI	12.6196	8.32229	0.129588
46	Left posterior tibial systolic blood pressure	birth_year	-0.724668	0.0713455	1.1508e-23		46	Left posterior tibial systolic blood pressure	birth_year	-1.77276	0.163375	1.08721e-26
47	Left posterior tibial systolic blood pressure	GENDER	7.89641	1.13337	4.38008e-12		47	Left posterior tibial systolic blood pressure	GENDER	18.8465	2.59533	5.46039e-13
48	Left posterior tibial systolic blood pressure	log(WEIGHT_FINAL_NORM_OVERALL)	-0.318024	0.844939	0.706669		48	Left posterior tibial systolic blood pressure	log(WEIGHT_FINAL_NORM_OVERALL)	-0.841664	1.93484	0.663606
49	Left posterior tibial systolic blood pressure	CENTERC	6.44615	4.24969	0.129462		49	Left posterior tibial systolic blood pressure	CENTERC	14.2483	9.73142	0.14331
50	Left posterior tibial systolic blood pressure	CENTERM	9.28692	8.89583	0.296629		50	Left posterior tibial systolic blood pressure	CENTERM	22.4575	20.3707	0.270403
51	Left posterior tibial systolic blood pressure	CENTERS	7.51005	4.25968	0.0780449		51	Left posterior tibial systolic blood pressure	CENTERS	17.4414	9.75431	0.0739164
52	Left posterior tibial systolic blood pressure	Education2	-1.6066	1.45452	0.269486		52	Left posterior tibial systolic blood pressure	Education2	-3.07359	3.33073	0.356225
53	Left posterior tibial systolic blood pressure	Education3	-1.99392	1.29944	0.12508		53	Left posterior tibial systolic blood pressure	Education3	-4.77145	2.97562	0.10898
54	Left posterior tibial systolic blood pressure	US_BORN	-1.47556	2.30667	0.522446		54	Left posterior tibial systolic blood pressure	US_BORN	-3.20829	5.28209	0.543661
55	Left posterior tibial systolic blood pressure	num_us_parents	0.828945	1.61036	0.606778		55	Left posterior tibial systolic blood pressure	num_us_parents	1.89934	3.68758	0.606565
56	Left dorsalis pedis systolic blood pressure	AI	5.66474	3.74602	0.130642		56	Left dorsalis pedis systolic blood pressure	AI	12.4285	8.32113	0.135438
57	Left dorsalis pedis systolic blood pressure	birth_year	-0.78598	0.0735626	6.00162e-26		57	Left dorsalis pedis systolic blood pressure	birth_year	-1.8613	0.163406	3.65952e-29
58	Left dorsalis pedis systolic blood pressure	GENDER	6.68586	1.16828	1.20709e-08		58	Left dorsalis pedis systolic blood pressure	GENDER	15.7488	2.59513	1.5413e-09
59	Left dorsalis pedis systolic blood pressure	log(WEIGHT_FINAL_NORM_OVERALL)	1.0146	0.870337	0.243853		59	Left dorsalis pedis systolic blood pressure	log(WEIGHT_FINAL_NORM_OVERALL)	2.01769	1.9333	0.296773
60	Left dorsalis pedis systolic blood pressure	CENTERC	8.10793	4.37936	0.0642611		60	Left dorsalis pedis systolic blood pressure	CENTERC	17.2548	9.72798	0.0762618
61	Left dorsalis pedis systolic blood pressure	CENTERM	1.02402	9.16629	0.91106		61	Left dorsalis pedis systolic blood pressure	CENTERM	20.6556	20.3613	0.310489
62	Left dorsalis pedis systolic blood pressure	CENTERS	8.64341	4.38867	0.0490367		62	Left dorsalis pedis systolic blood pressure	CENTERS	19.0743	9.74866	0.050534
63	Left dorsalis pedis systolic blood pressure	Education2	-1.02208	1.49775	0.49506		63	Left dorsalis pedis systolic blood pressure	Education2	-1.77035	3.32699	0.594705
64	Left dorsalis pedis systolic blood pressure	Education3	-2.0738	1.34041	0.121991		64	Left dorsalis pedis systolic blood pressure	Education3	-4.88342	2.97749	0.10114
65	Left dorsalis pedis systolic blood pressure	US_BORN	-1.31144	2.38508	0.582484		65	Left dorsalis pedis systolic blood pressure	US_BORN	-2.40771	5.29803	0.649551
66	Left dorsalis pedis systolic blood pressure	num_us_parents	0.900816	1.66275	0.588042		66	Left dorsalis pedis systolic blood pressure	num_us_parents	2.05959	3.6935	0.577163
67	Left brachial systolic blood pressure	AI	0.54522	2.84313	0.847944		67	Left brachial systolic blood pressure	AI	1.72564	8.64326	0.841773
68	Left brachial systolic blood pressure	birth_year	-0.723687	0.0557781	5.2664e-37		68	Left brachial systolic blood pressure	birth_year	-2.08612	0.169568	1.42866e-33
69	Left brachial systolic blood pressure	GENDER	-0.945613	0.886149	0.286055		69	Left brachial systolic blood pressure	GENDER	-2.53613	2.69394	0.346603
70	Left brachial systolic blood pressure	log(WEIGHT_FINAL_NORM_OVERALL)	0.134441	0.659978	0.838605		70	Left brachial systolic blood pressure	log(WEIGHT_FINAL_NORM_OVERALL)	-0.339247	2.00637	0.865747
71	Left brachial systolic blood pressure	CENTERC	4.16911	3.31542	0.208724		71	Left brachial systolic blood pressure	CENTERC	10.9109	10.079	0.279147
72	Left brachial systolic blood pressure	CENTERM	17.5507	6.94033	0.0115224		72	Left brachial systolic blood pressure	CENTERM	51.3224	21.099	0.0150847
73	Left brachial systolic blood pressure	CENTERS	6.86693	3.32378	0.0389585		73	Left brachial systolic blood pressure	CENTERS	19.0912	10.1045	0.0589873
74	Left brachial systolic blood pressure	Education2	-1.7391	1.13745	0.126437		74	Left brachial systolic blood pressure	Education2	-5.54808	3.4579	0.108771
75	Left brachial systolic blood pressure	Education3	-3.01921	1.01733	0.00303562		75	Left brachial systolic blood pressure	Education3	-8.28639	3.09274	0.00743869
76	Left brachial systolic blood pressure	US_BORN	-1.84571	1.80673	0.307108		76	Left brachial systolic blood pressure	US_BORN	-2.37498	5.49256	0.665498
77	Left brachial systolic blood pressure	num_us_parents	1.35068	1.26179	0.284549		77	Left brachial systolic blood pressure	num_us_parents	4.20802	3.83592	0.272774
78	High-sensitivity C-reactive protein	AI	-0.588185	0.864816	0.496468		78	High-sensitivity C-reactive protein	AI	0.83607	6.59922	0.899191
79	High-sensitivity C-reactive protein	birth_year	-0.0115802	0.0115771	0.31725		79	High-sensitivity C-reactive protein	birth_year	-0.263751	0.0883424	0.00284973
80	High-sensitivity C-reactive protein	GENDER	-1.62726	0.260408	4.61656e-10		80	High-sensitivity C-reactive protein	GENDER	-21.4056	1.98712	1.18086e-26
81	High-sensitivity C-reactive protein	log(WEIGHT_FINAL_NORM_OVERALL)	0.0204623	0.17913	0.909061		81	High-sensitivity C-reactive protein	log(WEIGHT_FINAL_NORM_OVERALL)	-0.545296	1.3669	0.689969
82	High-sensitivity C-reactive protein	CENTERC	0.897941	0.742736	0.226756		82	High-sensitivity C-reactive protein	CENTERC	3.24121	5.66765	0.567441
83	High-sensitivity C-reactive protein	CENTERM	-0.172371	1.64056	0.916327		83	High-sensitivity C-reactive protein	CENTERM	-4.96133	12.5188	0.691899
84	High-sensitivity C-reactive protein	CENTERS	0.461686	0.755881	0.541376		84	High-sensitivity C-reactive protein	CENTERS	1.94132	5.76796	0.736461
85	High-sensitivity C-reactive protein	Education2	-0.560205	0.318607	0.078782		85	High-sensitivity C-reactive protein	Education2	-4.35901	2.43122	0.0730671
86	High-sensitivity C-reactive protein	Education3	-0.344635	0.309476	0.265522		86	High-sensitivity C-reactive protein	Education3	-2.11235	2.36154	0.371126
87	High-sensitivity C-reactive protein	US_BORN	1.58415	0.405089	9.37505e-05		87	High-sensitivity C-reactive protein	US_BORN	8.65633	3.09114	0.0051316
88	High-sensitivity C-reactive protein	num_us_parents	0.122716	0.356334	0.730576		88	High-sensitivity C-reactive protein	num_us_parents	2.05279	2.7191	0.450328
89	Glycosylated hemoglobin (HbA1c)	AI	9.52851	1.64319	7.25623e-09		89	Glycosylated hemoglobin (HbA1c)	AI	42.7147	6.09273	2.81906e-12
90	Glycosylated hemoglobin (HbA1c)	birth_year	-0.287773	0.0219604	2.33213e-38		90	Glycosylated hemoglobin (HbA1c)	birth_year	-1.69827	0.0814264	2.78338e-91
91	Glycosylated hemoglobin (HbA1c)	GENDER	1.00647	0.49433	0.0418211		91	Glycosylated hemoglobin (HbA1c)	GENDER	1.04812	1.83291	0.567472
92	Glycosylated hemoglobin (HbA1c)	log(WEIGHT_FINAL_NORM_OVERALL)	-0.519467	0.339958	0.126593		92	Glycosylated hemoglobin (HbA1c)	log(WEIGHT_FINAL_NORM_OVERALL)	-2.98126	1.26052	0.0180778
93	Glycosylated hemoglobin (HbA1c)	CENTERC	1.11779	1.40745	0.427135		93	Glycosylated hemoglobin (HbA1c)	CENTERC	3.30283	5.21864	0.526845
94	Glycosylated hemoglobin (HbA1c)	CENTERM	1.67868	3.10802	0.589152		94	Glycosylated hemoglobin (HbA1c)	CENTERM	0.393383	11.5241	0.972771
95	Glycosylated hemoglobin (HbA1c)	CENTERS	0.519122	1.43267	0.717114		95	Glycosylated hemoglobin (HbA1c)	CENTERS	0.922422	5.31214	0.862155
96	Glycosylated hemoglobin (HbA1c)	Education2	-0.767435	0.604873	0.204611		96	Glycosylated hemoglobin (HbA1c)	Education2	-4.91602	2.24279	0.0284489
97	Glycosylated hemoglobin (HbA1c)	Education3	-1.12772	0.587163	0.0548574		97	Glycosylated hemoglobin (HbA1c)	Education3	-5.85014	2.17712	0.00724083
98	Glycosylated hemoglobin (HbA1c)	US_BORN	1.50407	0.7682	0.0503176		98	Glycosylated hemoglobin (HbA1c)	US_BORN	4.77958	2.84838	0.0934348
99	Glycosylated hemoglobin (HbA1c)	num_us_parents	-0.024465	0.675317	0.971103		99	Glycosylated hemoglobin (HbA1c)	num_us_parents	1.88007	2.50399	0.452804
100	Age at which menses began	AI	0.171339	0.269934	0.525664		100	Age at which menses began	AI	7.89495	8.71515	0.365099
101	Age at which menses began	birth_year	-0.0192315	0.00352277	5.34689e-08		101	Age at which menses began	birth_year	-0.648563	0.113737	1.34853e-08
102	Age at which menses began	log(WEIGHT_FINAL_NORM_OVERALL)	0.00919007	0.0534937	0.863614		102	Age at which menses began	log(WEIGHT_FINAL_NORM_OVERALL)	0.127048	1.72711	0.941367
103	Age at which menses began	CENTERC	-0.15791	0.231103	0.4945		103	Age at which menses began	CENTERC	-3.63284	7.46145	0.626393
104	Age at which menses began	CENTERM	-0.163917	0.526486	0.755571		104	Age at which menses began	CENTERM	-1.18134	16.9982	0.9446
105	Age at which menses began	CENTERS	-0.239155	0.235448	0.309868		105	Age at which menses began	CENTERS	-5.5451	7.60171	0.465805
106	Age at which menses began	Education2	-0.140941	0.0978963	0.150102		106	Age at which menses began	Education2	-4.65211	3.1607	0.141208
107	Age at which menses began	Education3	-0.192737	0.0926974	0.0377194		107	Age at which menses began	Education3	-6.60918	2.99285	0.0273289
108	Age at which menses began	US_BORN	-0.203644	0.125907	0.105939		108	Age at which menses began	US_BORN	-3.6529	4.06507	0.368965
109	Age at which menses began	num_us_parents	-0.00470347	0.114262	0.967169		109	Age at which menses began	num_us_parents	-0.73523	3.68909	0.842049
110	FEV1	AI	-390.141	57.4445	1.29681e-11		110	FEV1	AI	-26.4367	4.3806	1.75553e-09
111	FEV1	birth_year	29.0363	0.7712	6.7662e-261		111	FEV1	birth_year	2.0085	0.0588102	5.55561e-221
112	FEV1	GENDER	966.022	17.2264	0		112	FEV1	GENDER	67.5808	1.31365	0
113	FEV1	log(WEIGHT_FINAL_NORM_OVERALL)	-13.055	11.8659	0.271317		113	FEV1	log(WEIGHT_FINAL_NORM_OVERALL)	-1.05492	0.904873	0.243765
114	FEV1	CENTERC	-102.874	49.9822	0.039644		114	FEV1	CENTERC	-7.28137	3.81155	0.0561703
115	FEV1	CENTERM	176.633	109.548	0.106969		115	FEV1	CENTERM	12.3669	8.35391	0.138863
116	FEV1	CENTERS	-24.5063	50.8697	0.630016		116	FEV1	CENTERS	-1.49	3.87922	0.70093
117	FEV1	Education2	39.6638	21.0665	0.059811		117	FEV1	Education2	3.10678	1.60649	0.0532065
118	FEV1	Education3	75.5034	20.4804	0.000230691		118	FEV1	Education3	5.21577	1.56179	0.000847745
119	FEV1	US_BORN	32.0134	26.9859	0.235584		119	FEV1	US_BORN	4.07905	2.05789	0.0475404
120	FEV1	num_us_parents	16.8716	23.6	0.47472		120	FEV1	num_us_parents	-0.198628	1.79969	0.912124
121	BMI	AI	1.30992	0.669127	0.0503482		121	BMI	AI	12.1529	6.67499	0.0687407
122	BMI	birth_year	-0.0218617	0.00896241	0.0147654		122	BMI	birth_year	-0.213114	0.089406	0.0171928
123	BMI	GENDER	-0.931181	0.201617	3.99937e-06		123	BMI	GENDER	-8.95501	2.01126	8.7483e-06
124	BMI	log(WEIGHT_FINAL_NORM_OVERALL)	-0.451954	0.138527	0.0011144		124	BMI	log(WEIGHT_FINAL_NORM_OVERALL)	-4.82326	1.3819	0.000488258
125	BMI	CENTERC	-0.187955	0.573905	0.743307		125	BMI	CENTERC	-2.98439	5.72509	0.602202
126	BMI	CENTERM	-0.49328	1.26734	0.697132		126	BMI	CENTERM	-5.28411	12.6425	0.675999
127	BMI	CENTERS	-0.0592036	0.584071	0.919267		127	BMI	CENTERS	-2.18227	5.8265	0.708023
128	BMI	Education2	-0.464575	0.246446	0.0594966		128	BMI	Education2	-4.67044	2.45846	0.0575468
129	BMI	Education3	-0.20263	0.23945	0.39748		129	BMI	Education3	-2.01357	2.38867	0.399304
130	BMI	US_BORN	1.3789	0.313653	1.13317e-05		130	BMI	US_BORN	13.5578	3.12889	1.51048e-05
131	BMI	num_us_parents	-0.0368861	0.275647	0.893555		131	BMI	num_us_parents	0.517018	2.74976	0.850869
132	HEIGHT	AI	-12.7269	0.693921	6.74285e-72		132	HEIGHT	AI	-77.5411	4.57969	6.20732e-62
133	HEIGHT	birth_year	0.119872	0.00929912	3.34202e-37		133	HEIGHT	birth_year	0.717466	0.0613716	5.14846e-31
134	HEIGHT	GENDER	13.2132	0.209096	0		134	HEIGHT	GENDER	76.7894	1.37997	0
135	HEIGHT	log(WEIGHT_FINAL_NORM_OVERALL)	-0.215262	0.143723	0.134283		135	HEIGHT	log(WEIGHT_FINAL_NORM_OVERALL)	-0.888586	0.948529	0.348922
136	HEIGHT	CENTERC	0.38952	0.595759	0.513268		136	HEIGHT	CENTERC	2.82405	3.93184	0.472648
137	HEIGHT	CENTERM	0.358534	1.31573	0.785255		137	HEIGHT	CENTERM	3.49921	8.68345	0.686991
138	HEIGHT	CENTERS	1.43894	0.606284	0.0176784		138	HEIGHT	CENTERS	8.29382	4.00131	0.038264
139	HEIGHT	Education2	0.972509	0.255811	0.000146109		139	HEIGHT	Education2	6.3775	1.68828	0.00016097
140	HEIGHT	Education3	1.37696	0.248405	3.18294e-08		140	HEIGHT	Education3	8.27948	1.6394	4.63014e-07
141	HEIGHT	US_BORN	0.955907	0.325416	0.0033298		141	HEIGHT	US_BORN	6.11066	2.14765	0.00446247
142	HEIGHT	num_us_parents	0.357464	0.285981	0.211397		142	HEIGHT	num_us_parents	2.31264	1.88739	0.22054
143	White blood count	AI	-0.293151	0.215254	0.173325		143	White blood count	AI	-9.55069	6.86749	0.164403
144	White blood count	birth_year	0.0067285	0.00284179	0.0179544		144	White blood count	birth_year	0.214792	0.0906646	0.0178874
145	White blood count	GENDER	-0.414837	0.0644826	1.42176e-10		145	White blood count	GENDER	-13.219	2.05726	1.4953e-10
146	White blood count	log(WEIGHT_FINAL_NORM_OVERALL)	0.00903703	0.0440795	0.837571		146	White blood count	log(WEIGHT_FINAL_NORM_OVERALL)	0.197414	1.40631	0.88837
147	White blood count	CENTERC	-0.0736854	0.183203	0.687557		147	White blood count	CENTERC	-1.67422	5.84492	0.774558
148	White blood count	CENTERM	-0.106162	0.409661	0.795537		148	White blood count	CENTERM	-1.88348	13.0698	0.885423
149	White blood count	CENTERS	0.372778	0.186187	0.045345		149	White blood count	CENTERS	12.0148	5.94012	0.0431861
150	White blood count	Education2	-0.0773397	0.0787621	0.326198		150	White blood count	Education2	-2.78034	2.51283	0.268606
151	White blood count	Education3	-0.0899943	0.0760299	0.236626		151	White blood count	Education3	-2.93842	2.42566	0.22583
152	White blood count	US_BORN	0.130383	0.0990115	0.187977		152	White blood count	US_BORN	4.49928	3.15887	0.154442
153	White blood count	num_us_parents	-0.00819483	0.0867251	0.924724		153	White blood count	num_us_parents	-0.296102	2.76688	0.914782
154	Neutrophil count	AI	-0.432296	0.170805	0.0114204		154	Neutrophil count	AI	-16.0445	6.8354	0.0189681
155	Neutrophil count	birth_year	0.00416218	0.00225521	0.0650389		155	Neutrophil count	birth_year	0.179397	0.0902505	0.0469171
156	Neutrophil count	GENDER	-0.419069	0.0511739	3.67342e-16		156	Neutrophil count	GENDER	-16.3587	2.04791	1.85639e-15
157	Neutrophil count	log(WEIGHT_FINAL_NORM_OVERALL)	0.0168796	0.0349898	0.629542		157	Neutrophil count	log(WEIGHT_FINAL_NORM_OVERALL)	0.541687	1.40025	0.69889
158	Neutrophil count	CENTERC	-0.0760151	0.145398	0.601142		158	Neutrophil count	CENTERC	-1.59642	5.81863	0.783822
159	Neutrophil count	CENTERM	-0.308431	0.325106	0.342836		159	Neutrophil count	CENTERM	-9.38813	13.0103	0.470595
160	Neutrophil count	CENTERS	0.279338	0.147757	0.0587727		160	Neutrophil count	CENTERS	11.7019	5.91305	0.0478968
161	Neutrophil count	Education2	-0.0111763	0.0625021	0.858094		161	Neutrophil count	Education2	-0.811216	2.50125	0.745713
162	Neutrophil count	Education3	-0.0223272	0.0603549	0.711456		162	Neutrophil count	Education3	-0.728002	2.41533	0.763121
163	Neutrophil count	US_BORN	0.0855323	0.0785833	0.276482		163	Neutrophil count	US_BORN	3.4912	3.1448	0.267012
164	Neutrophil count	num_us_parents	-0.055473	0.0688249	0.420297		164	Neutrophil count	num_us_parents	-2.15977	2.75428	0.433007
165	Lymphocyte count	AI	0.150739	0.0792437	0.0572254		165	Lymphocyte count	AI	14.0273	6.93293	0.0431214
166	Lymphocyte count	birth_year	0.00267347	0.00104629	0.0106555		166	Lymphocyte count	birth_year	0.233208	0.0915382	0.0108881
167	Lymphocyte count	GENDER	-0.0737851	0.0237417	0.00190015		167	Lymphocyte count	GENDER	-6.56372	2.07713	0.00159148
168	Lymphocyte count	log(WEIGHT_FINAL_NORM_OVERALL)	-0.00508429	0.0162332	0.754146		168	Lymphocyte count	log(WEIGHT_FINAL_NORM_OVERALL)	-0.35941	1.42022	0.800233
169	Lymphocyte count	CENTERC	-0.0220228	0.0674562	0.744084		169	Lymphocyte count	CENTERC	-1.93796	5.90165	0.742648
170	Lymphocyte count	CENTERM	0.119804	0.15083	0.427076		170	Lymphocyte count	CENTERM	10.0979	13.1959	0.444188
171	Lymphocyte count	CENTERS	0.0469962	0.0685508	0.493032		171	Lymphocyte count	CENTERS	4.31003	5.99742	0.472407
172	Lymphocyte count	Education2	-0.0405315	0.0289974	0.162274		172	Lymphocyte count	Education2	-3.33952	2.53694	0.188143
173	Lymphocyte count	Education3	-0.0455476	0.0280012	0.103908		173	Lymphocyte count	Education3	-3.9506	2.44979	0.106918
174	Lymphocyte count	US_BORN	0.00963458	0.0364581	0.791592		174	Lymphocyte count	US_BORN	0.464966	3.18967	0.88411
175	Lymphocyte count	num_us_parents	0.0319616	0.0319308	0.316915		175	Lymphocyte count	num_us_parents	3.16535	2.79358	0.257261
176	Monocyte count	AI	-0.0428817	0.0199786	0.031913		176	Monocyte count	AI	-14.6163	6.67243	0.0285515
177	Monocyte count	birth_year	0.000365541	0.000263788	0.165918		177	Monocyte count	birth_year	0.137507	0.0880996	0.118661
178	Monocyte count	GENDER	0.0413553	0.00598527	5.77412e-12		178	Monocyte count	GENDER	13.8938	1.99895	4.33719e-12
179	Monocyte count	log(WEIGHT_FINAL_NORM_OVERALL)	0.00334019	0.00409152	0.414346		179	Monocyte count	log(WEIGHT_FINAL_NORM_OVERALL)	1.04144	1.36648	0.446033
180	Monocyte count	CENTERC	0.00247285	0.0170054	0.884391		180	Monocyte count	CENTERC	0.696245	5.67944	0.902439
181	Monocyte count	CENTERM	0.0296327	0.0380271	0.435885		181	Monocyte count	CENTERM	9.34548	12.7002	0.461872
182	Monocyte count	CENTERS	0.0212922	0.0172829	0.218041		182	Monocyte count	CENTERS	6.94713	5.77212	0.22884
183	Monocyte count	Education2	-0.0294962	0.00731079	5.58863e-05		183	Monocyte count	Education2	-9.87748	2.44165	5.33816e-05
184	Monocyte count	Education3	-0.0218668	0.00705728	0.00196098		184	Monocyte count	Education3	-7.18823	2.35698	0.00230775
185	Monocyte count	US_BORN	0.0317877	0.00919081	0.00054953		185	Monocyte count	US_BORN	10.6086	3.06953	0.000554717
186	Monocyte count	num_us_parents	0.00398714	0.00805035	0.620438		186	Monocyte count	num_us_parents	1.25268	2.68864	0.641307
187	Eosinophil count	AI	0.0272826	0.0171909	0.112596		187	Eosinophil count	AI	9.83542	6.48699	0.129567
188	Eosinophil count	birth_year	-0.000228423	0.000227055	0.314474		188	Eosinophil count	birth_year	-0.108692	0.0856794	0.204673
189	Eosinophil count	GENDER	0.0342166	0.0051503	3.54661e-11		189	Eosinophil count	GENDER	14.0543	1.94347	5.86177e-13
190	Eosinophil count	log(WEIGHT_FINAL_NORM_OVERALL)	-0.00689365	0.00352051	0.050295		190	Eosinophil count	log(WEIGHT_FINAL_NORM_OVERALL)	-2.84904	1.32847	0.0320549
191	Eosinophil count	CENTERC	0.0238245	0.0146322	0.103568		191	Eosinophil count	CENTERC	8.64723	5.52146	0.117414
192	Eosinophil count	CENTERM	0.0445326	0.0327199	0.173596		192	Eosinophil count	CENTERM	14.7911	12.3469	0.231014
193	Eosinophil count	CENTERS	0.0315015	0.0148708	0.0342184		193	Eosinophil count	CENTERS	12.2737	5.61153	0.0287932
194	Eosinophil count	Education2	0.00157448	0.00629078	0.802383		194	Eosinophil count	Education2	0.552423	2.37383	0.815998
195	Eosinophil count	Education3	-0.00676019	0.00607325	0.26574		195	Eosinophil count	Education3	-2.86677	2.29174	0.211052
196	Eosinophil count	US_BORN	0.00733273	0.00790827	0.353876		196	Eosinophil count	US_BORN	2.67073	2.98419	0.370872
197	Eosinophil count	num_us_parents	0.00578448	0.00692703	0.403743		197	Eosinophil count	num_us_parents	3.15319	2.61392	0.227783
198	Basophil count	AI	-0.00286954	0.00495073	0.562209		198	Basophil count	AI	-2.20588	5.06733	0.663362
199	Basophil count	birth_year	-0.00021403	6.53449e-05	0.00106567		199	Basophil count	birth_year	-0.225372	0.0668839	0.00076112
200	Basophil count	GENDER	0.000911084	0.00148238	0.538854		200	Basophil count	GENDER	0.87899	1.51729	0.562415
201	Basophil count	log(WEIGHT_FINAL_NORM_OVERALL)	5.98471e-05	0.00101337	0.95291		201	Basophil count	log(WEIGHT_FINAL_NORM_OVERALL)	0.127764	1.03724	0.901974
202	Basophil count	CENTERC	0.000325856	0.00422224	0.938488		202	Basophil count	CENTERC	0.846506	4.32169	0.84472
203	Basophil count	CENTERM	0.00403837	0.00942032	0.668178		203	Basophil count	CENTERM	4.02207	9.64219	0.676608
204	Basophil count	CENTERS	-0.00121221	0.00428982	0.777517		204	Basophil count	CENTERS	-0.638381	4.39085	0.884412
205	Basophil count	Education2	-0.000418686	0.00181058	0.817139		205	Basophil count	Education2	-0.661417	1.85322	0.721188
206	Basophil count	Education3	-0.00164574	0.00174913	0.346826		206	Basophil count	Education3	-2.25543	1.79032	0.207832
207	Basophil count	US_BORN	0.000381131	0.00227567	0.867002		207	Basophil count	US_BORN	0.40686	2.32927	0.861347
208	Basophil count	num_us_parents	0.00370142	0.00199327	0.0634028		208	Basophil count	num_us_parents	4.18948	2.04021	0.0401044
209	Weight	AI	-8.55085	1.89826	6.8619e-06		209	Weight	AI	-28.8785	6.38023	6.19818e-06
210	Weight	birth_year	0.0550055	0.0254077	0.0304599		210	Weight	birth_year	0.179744	0.0853976	0.0353784
211	Weight	GENDER	10.354	0.571862	3.44231e-70		211	Weight	GENDER	34.2324	1.92208	4.56684e-68
212	Weight	log(WEIGHT_FINAL_NORM_OVERALL)	-1.30276	0.393031	0.00092665		212	Weight	log(WEIGHT_FINAL_NORM_OVERALL)	-4.03772	1.32102	0.00225562
213	Weight	CENTERC	-0.121762	1.62834	0.940396		213	Weight	CENTERC	-0.585442	5.473	0.914819
214	Weight	CENTERM	-1.06959	3.59609	0.766155		214	Weight	CENTERM	-4.17784	12.0868	0.729623
215	Weight	CENTERS	1.31231	1.65717	0.428471		215	Weight	CENTERS	4.09762	5.5699	0.461978
216	Weight	Education2	-0.0303586	0.699078	0.965364		216	Weight	Education2	-0.256502	2.34967	0.913077
217	Weight	Education3	0.979109	0.679281	0.149561		217	Weight	Education3	3.4127	2.28313	0.135068
218	Weight	US_BORN	4.57323	0.889909	2.90916e-07		218	Weight	US_BORN	14.1562	2.99107	2.29962e-06
219	Weight	num_us_parents	0.181586	0.782137	0.816422		219	Weight	num_us_parents	1.63838	2.62884	0.533169
220	Hemoglobin	AI	-0.0280861	0.133103	0.832892		220	Hemoglobin	AI	1.25615	5.08674	0.804965
221	Hemoglobin	birth_year	0.00207636	0.00177979	0.243437		221	Hemoglobin	birth_year	0.126608	0.0680175	0.0627687
222	Hemoglobin	GENDER	2.05845	0.0400426	0		222	Hemoglobin	GENDER	77.0626	1.53029	0
223	Hemoglobin	log(WEIGHT_FINAL_NORM_OVERALL)	-0.00834969	0.0275887	0.762175		223	Hemoglobin	log(WEIGHT_FINAL_NORM_OVERALL)	-0.431424	1.05434	0.682427
224	Hemoglobin	CENTERC	0.0667769	0.114259	0.558966		224	Hemoglobin	CENTERC	2.48439	4.36659	0.569423
225	Hemoglobin	CENTERM	0.132732	0.25155	0.597769		225	Hemoglobin	CENTERM	9.49823	9.61335	0.323208
226	Hemoglobin	CENTERS	0.0954337	0.116329	0.412057		226	Hemoglobin	CENTERS	2.83089	4.4457	0.524315
227	Hemoglobin	Education2	0.043987	0.0489789	0.369202		227	Hemoglobin	Education2	1.28452	1.8718	0.492603
228	Hemoglobin	Education3	0.0137969	0.0475199	0.771574		228	Hemoglobin	Education3	0.185921	1.81605	0.918463
229	Hemoglobin	US_BORN	-0.028109	0.0621301	0.650993		229	Hemoglobin	US_BORN	-2.19209	2.3744	0.355956
230	Hemoglobin	num_us_parents	0.0383119	0.0547311	0.483971		230	Hemoglobin	num_us_parents	1.70704	2.09163	0.41448
231	Mean corpuscular volume	AI	-0.181323	0.640528	0.777129		231	Mean corpuscular volume	AI	3.66003	6.63159	0.581046
232	Mean corpuscular volume	birth_year	-0.0773988	0.00856483	2.57997e-19		232	Mean corpuscular volume	birth_year	-0.862549	0.0886745	4.32418e-22
233	Mean corpuscular volume	GENDER	0.572754	0.192695	0.0029752		233	Mean corpuscular volume	GENDER	1.78922	1.99504	0.369867
234	Mean corpuscular volume	log(WEIGHT_FINAL_NORM_OVERALL)	0.264792	0.132764	0.0461781		234	Mean corpuscular volume	log(WEIGHT_FINAL_NORM_OVERALL)	2.91431	1.37455	0.0340581
235	Mean corpuscular volume	CENTERC	0.938922	0.549846	0.0877952		235	Mean corpuscular volume	CENTERC	12.1776	5.69273	0.0324915
236	Mean corpuscular volume	CENTERM	-1.28641	1.21052	0.287993		236	Mean corpuscular volume	CENTERM	-10.4132	12.5329	0.406106
237	Mean corpuscular volume	CENTERS	0.249715	0.559807	0.655571		237	Mean corpuscular volume	CENTERS	3.93164	5.79586	0.497592
238	Mean corpuscular volume	Education2	0.419782	0.235699	0.074996		238	Mean corpuscular volume	Education2	4.66499	2.44027	0.0559983
239	Mean corpuscular volume	Education3	0.444703	0.228678	0.0518935		239	Mean corpuscular volume	Education3	5.63559	2.36758	0.0173499
240	Mean corpuscular volume	US_BORN	0.172247	0.298987	0.564583		240	Mean corpuscular volume	US_BORN	1.48459	3.0955	0.631544
241	Mean corpuscular volume	num_us_parents	0.112643	0.26338	0.668908		241	Mean corpuscular volume	num_us_parents	1.47506	2.72686	0.588586
242	Platelet count	AI	2.08726	6.94684	0.763842		242	Platelet count	AI	1.75188	6.36341	0.783097
243	Platelet count	birth_year	0.432996	0.0929245	3.28274e-06		243	Platelet count	birth_year	0.379676	0.0851202	8.42923e-06
244	Platelet count	GENDER	-43.4668	2.09006	8.80949e-91		244	Platelet count	GENDER	-38.7405	1.91453	2.721e-86
245	Platelet count	log(WEIGHT_FINAL_NORM_OVERALL)	-0.692013	1.44018	0.630898		245	Platelet count	log(WEIGHT_FINAL_NORM_OVERALL)	-0.804971	1.31922	0.541778
246	Platelet count	CENTERC	-6.85432	5.96322	0.250454		246	Platelet count	CENTERC	-5.08572	5.46239	0.351894
247	Platelet count	CENTERM	-13.9636	13.1283	0.28757		247	Platelet count	CENTERM	-11.6429	12.0257	0.333025
248	Platelet count	CENTERS	-5.29003	6.07125	0.383635		248	Platelet count	CENTERS	-4.55852	5.56135	0.412454
249	Platelet count	Education2	5.6271	2.55658	0.0277976		249	Platelet count	Education2	4.9652	2.34186	0.0340583
250	Platelet count	Education3	0.666211	2.48146	0.788349		250	Platelet count	Education3	0.325519	2.27305	0.886134
251	Platelet count	US_BORN	1.22189	3.24268	0.706334		251	Platelet count	US_BORN	2.07064	2.97034	0.485783
252	Platelet count	num_us_parents	-3.81513	2.85652	0.181769		252	Platelet count	num_us_parents	-3.50975	2.61661	0.179898
253	Mean corpuscular hemoglobin	AI	0.101849	0.242303	0.674264		253	Mean corpuscular hemoglobin	AI	8.59021	6.46698	0.184157
254	Mean corpuscular hemoglobin	birth_year	-0.0216782	0.00323996	2.56402e-11		254	Mean corpuscular hemoglobin	birth_year	-0.735916	0.0864733	2.51396e-17
255	Mean corpuscular hemoglobin	GENDER	1.11003	0.0728941	8.69531e-51		255	Mean corpuscular hemoglobin	GENDER	29.4802	1.94551	2.55115e-50
256	Mean corpuscular hemoglobin	log(WEIGHT_FINAL_NORM_OVERALL)	0.0831628	0.0502229	0.0978348		256	Mean corpuscular hemoglobin	log(WEIGHT_FINAL_NORM_OVERALL)	2.61611	1.34043	0.0510518
257	Mean corpuscular hemoglobin	CENTERC	0.0543452	0.207999	0.793895		257	Mean corpuscular hemoglobin	CENTERC	4.16053	5.55142	0.453633
258	Mean corpuscular hemoglobin	CENTERM	-0.385685	0.457925	0.399707		258	Mean corpuscular hemoglobin	CENTERM	0.65825	12.2218	0.957051
259	Mean corpuscular hemoglobin	CENTERS	0.158199	0.211768	0.455089		259	Mean corpuscular hemoglobin	CENTERS	6.5412	5.65199	0.247216
260	Mean corpuscular hemoglobin	Education2	0.0540163	0.0891619	0.544671		260	Mean corpuscular hemoglobin	Education2	1.2389	2.37969	0.602669
261	Mean corpuscular hemoglobin	Education3	0.0960263	0.086506	0.267051		261	Mean corpuscular hemoglobin	Education3	2.25316	2.30881	0.329182
262	Mean corpuscular hemoglobin	US_BORN	0.00813245	0.113103	0.942683		262	Mean corpuscular hemoglobin	US_BORN	0.381707	3.01867	0.899384
263	Mean corpuscular hemoglobin	num_us_parents	0.0431294	0.0996333	0.665127		263	Mean corpuscular hemoglobin	num_us_parents	1.0147	2.65917	0.702792
264	FVC	AI	-613.839	71.105	8.93105e-18		264	FVC	AI	-34.6221	4.47235	1.2772e-14
265	FVC	birth_year	28.8936	0.954594	5.05997e-179		265	FVC	birth_year	1.63082	0.0600419	1.26338e-147
266	FVC	GENDER	1306.22	21.323	0		266	FVC	GENDER	73.9577	1.34117	0
267	FVC	log(WEIGHT_FINAL_NORM_OVERALL)	-11.6925	14.6877	0.426042		267	FVC	log(WEIGHT_FINAL_NORM_OVERALL)	-0.69021	0.923824	0.455039
268	FVC	CENTERC	-151.119	61.8682	0.0146312		268	FVC	CENTERC	-8.46772	3.89137	0.02962
269	FVC	CENTERM	95.8861	135.599	0.479533		269	FVC	CENTERM	3.77533	8.52887	0.658044
270	FVC	CENTERS	-68.8517	62.9667	0.274265		270	FVC	CENTERS	-3.73555	3.96046	0.345639
271	FVC	Education2	44.1964	26.0762	0.0901837		271	FVC	Education2	2.83813	1.64013	0.0836419
272	FVC	Education3	90.0394	25.3507	0.000387703		272	FVC	Education3	5.79915	1.5945	0.000279834
273	FVC	US_BORN	-8.87152	33.4033	0.790572		273	FVC	US_BORN	0.460156	2.10099	0.826648
274	FVC	num_us_parents	37.9432	29.2122	0.194069		274	FVC	num_us_parents	1.39183	1.83738	0.448797
275	Average systolic blood pressure	AI	0.534473	1.76281	0.76176		275	Average systolic blood pressure	AI	0.182571	5.99578	0.97571
276	Average systolic blood pressure	birth_year	-0.524849	0.0235737	5.40878e-103		276	Average systolic blood pressure	birth_year	-1.7561	0.0801803	6.30316e-100
277	Average systolic blood pressure	GENDER	7.23654	0.530566	2.44573e-41		277	Average systolic blood pressure	GENDER	24.7267	1.80459	1.0767e-41
278	Average systolic blood pressure	log(WEIGHT_FINAL_NORM_OVERALL)	0.0976728	0.36487	0.788952		278	Average systolic blood pressure	log(WEIGHT_FINAL_NORM_OVERALL)	0.742818	1.24102	0.549507
279	Average systolic blood pressure	CENTERC	-1.2069	1.51248	0.424945		279	Average systolic blood pressure	CENTERC	-4.31463	5.14435	0.401686
280	Average systolic blood pressure	CENTERM	5.54946	3.39373	0.102092		280	Average systolic blood pressure	CENTERM	16.3124	11.5429	0.157685
281	Average systolic blood pressure	CENTERS	0.363873	1.53942	0.81316		281	Average systolic blood pressure	CENTERS	0.380359	5.23598	0.942094
282	Average systolic blood pressure	Education2	-1.32073	0.648886	0.0418848		282	Average systolic blood pressure	Education2	-4.71002	2.20703	0.0329018
283	Average systolic blood pressure	Education3	-3.16305	0.630436	5.49517e-07		283	Average systolic blood pressure	Education3	-10.4451	2.14428	1.15734e-06
284	Average systolic blood pressure	US_BORN	1.33798	0.824829	0.104863		284	Average systolic blood pressure	US_BORN	5.44112	2.80546	0.0525214
285	Average systolic blood pressure	num_us_parents	0.245417	0.725538	0.73519		285	Average systolic blood pressure	num_us_parents	0.0354464	2.46774	0.98854
286	Waist to hip ratio	AI	0.0419438	0.00708955	3.60063e-09		286	Waist to hip ratio	AI	29.5509	6.09738	1.30971e-06
287	Waist to hip ratio	birth_year	-0.00115079	9.48502e-05	3.12843e-33		287	Waist to hip ratio	birth_year	-0.910635	0.0815761	1.80542e-28
288	Waist to hip ratio	GENDER	0.0514899	0.00213408	2.39907e-119		288	Waist to hip ratio	GENDER	41.4621	1.83542	8.85538e-106
289	Waist to hip ratio	log(WEIGHT_FINAL_NORM_OVERALL)	-0.000361385	0.00146847	0.805621		289	Waist to hip ratio	log(WEIGHT_FINAL_NORM_OVERALL)	-0.392811	1.26296	0.7558
290	Waist to hip ratio	CENTERC	0.000488484	0.00608451	0.936016		290	Waist to hip ratio	CENTERC	2.44593	5.233	0.640238
291	Waist to hip ratio	CENTERM	-0.00329447	0.0134331	0.806277		291	Waist to hip ratio	CENTERM	-2.50941	11.5532	0.828061
292	Waist to hip ratio	CENTERS	-0.00435955	0.00619056	0.481338		292	Waist to hip ratio	CENTERS	-2.93583	5.32421	0.581386
293	Waist to hip ratio	Education2	-0.00852716	0.0026096	0.00109479		293	Waist to hip ratio	Education2	-7.27077	2.2444	0.0012082
294	Waist to hip ratio	Education3	-0.00953809	0.00253636	0.000172242		294	Waist to hip ratio	Education3	-7.99377	2.18141	0.000251388
295	Waist to hip ratio	US_BORN	0.00805357	0.00331737	0.0152438		295	Waist to hip ratio	US_BORN	8.16088	2.85311	0.00425624
296	Waist to hip ratio	num_us_parents	-0.000113658	0.00291772	0.968929		296	Waist to hip ratio	num_us_parents	0.949872	2.50939	0.705062
297	Waist girth	AI	1.02532	1.52632	0.501779		297	Waist girth	AI	4.26722	6.63808	0.52037
298	Waist girth	birth_year	-0.114136	0.0204205	2.44938e-08		298	Waist girth	birth_year	-0.445819	0.0888101	5.42014e-07
299	Waist girth	GENDER	1.20341	0.459451	0.00884968		299	Waist girth	GENDER	5.13243	1.99819	0.0102525
300	Waist girth	log(WEIGHT_FINAL_NORM_OVERALL)	-0.790421	0.316149	0.0124581		300	Waist girth	log(WEIGHT_FINAL_NORM_OVERALL)	-3.59638	1.37496	0.00894346
301	Waist girth	CENTERC	-0.318019	1.30994	0.808195		301	Waist girth	CENTERC	-1.57825	5.69705	0.781774
302	Waist girth	CENTERM	-0.350796	2.89204	0.903463		302	Waist girth	CENTERM	-1.04673	12.5777	0.933681
303	Waist girth	CENTERS	2.08742	1.33278	0.117385		303	Waist girth	CENTERS	9.17672	5.79634	0.113466
304	Waist girth	Education2	-1.04764	0.561826	0.062303		304	Waist girth	Education2	-4.43679	2.44343	0.0694833
305	Waist girth	Education3	-0.808461	0.546058	0.138817		305	Waist girth	Education3	-4.06189	2.37485	0.0872821
306	Waist girth	US_BORN	3.71793	0.714202	2.04064e-07		306	Waist girth	US_BORN	16.7006	3.10612	8.06944e-08
307	Waist girth	num_us_parents	-0.190071	0.628161	0.762225		307	Waist girth	num_us_parents	-0.720835	2.73192	0.791905
308	Hip girth	AI	-3.49453	1.3107	0.00770683		308	Hip girth	AI	-18.2466	6.45696	0.00474107
309	Hip girth	birth_year	-0.00200014	0.0175357	0.909196		309	Hip girth	birth_year	-0.00150513	0.0863868	0.9861
310	Hip girth	GENDER	-4.63143	0.394546	2.97765e-31		310	Hip girth	GENDER	-21.9281	1.94366	4.92672e-29
311	Hip girth	log(WEIGHT_FINAL_NORM_OVERALL)	-0.817259	0.271488	0.00262804		311	Hip girth	log(WEIGHT_FINAL_NORM_OVERALL)	-4.25992	1.33744	0.00145924
312	Hip girth	CENTERC	-0.412391	1.12489	0.713936		312	Hip girth	CENTERC	-3.27298	5.5416	0.554812
313	Hip girth	CENTERM	-0.0183232	2.4835	0.994114		313	Hip girth	CENTERM	-0.908825	12.2345	0.940789
314	Hip girth	CENTERS	2.6523	1.1445	0.0205363		314	Hip girth	CENTERS	11.6289	5.63819	0.0392291
315	Hip girth	Education2	-0.152833	0.482459	0.751429		315	Hip girth	Education2	-0.65888	2.37675	0.781628
316	Hip girth	Education3	0.257005	0.468918	0.583671		316	Hip girth	Education3	1.64312	2.31005	0.476949
317	Hip girth	US_BORN	3.07476	0.61331	5.60602e-07		317	Hip girth	US_BORN	14.3692	3.02137	2.05348e-06
318	Hip girth	num_us_parents	-0.168719	0.539423	0.754469		318	Hip girth	num_us_parents	-0.0495472	2.65738	0.985125
319	EGFR CKD Epi	AI	12.8426	1.62636	3.87475e-15		319	EGFR CKD Epi	AI	41.542	5.13608	8.42159e-16
320	EGFR CKD Epi	birth_year	0.885546	0.0220598	3.48308e-287		320	EGFR CKD Epi	birth_year	2.7965	0.0696655	3.58379e-287
321	EGFR CKD Epi	GENDER	-2.53675	0.493212	2.857e-07		321	EGFR CKD Epi	GENDER	-9.12536	1.55758	5.12472e-09
322	EGFR CKD Epi	log(WEIGHT_FINAL_NORM_OVERALL)	-1.10371	0.338355	0.00111766		322	EGFR CKD Epi	log(WEIGHT_FINAL_NORM_OVERALL)	-1.53775	1.06853	0.150212
323	EGFR CKD Epi	CENTERC	-4.57653	1.36856	0.000834874		323	EGFR CKD Epi	CENTERC	-13.249	4.32194	0.00219042
324	EGFR CKD Epi	CENTERM	-2.97522	2.97626	0.317554		324	EGFR CKD Epi	CENTERM	-13.3051	9.39911	0.156997
325	EGFR CKD Epi	CENTERS	-1.91694	1.39163	0.168457		325	EGFR CKD Epi	CENTERS	-6.42466	4.39479	0.143869
326	EGFR CKD Epi	Education2	-0.880726	0.602175	0.143679		326	EGFR CKD Epi	Education2	-3.12437	1.90168	0.100488
327	EGFR CKD Epi	Education3	-1.49701	0.586343	0.0107209		327	EGFR CKD Epi	Education3	-5.48922	1.85169	0.00305405
328	EGFR CKD Epi	US_BORN	-0.314215	0.775199	0.685257		328	EGFR CKD Epi	US_BORN	4.85465	2.4481	0.0474471
329	EGFR CKD Epi	num_us_parents	-1.22343	0.683157	0.0734097		329	EGFR CKD Epi	num_us_parents	-4.48492	2.15742	0.0377102
330	EGFR MDRD	AI	20.3743	2.50498	5.84483e-16		330	EGFR MDRD	AI	50.4302	6.31152	1.84635e-15
331	EGFR MDRD	birth_year	0.726486	0.0339774	4.36203e-95		331	EGFR MDRD	birth_year	1.73561	0.0856091	3.26001e-86
332	EGFR MDRD	GENDER	-1.11349	0.759663	0.142808		332	EGFR MDRD	GENDER	-2.97277	1.91404	0.120486
333	EGFR MDRD	log(WEIGHT_FINAL_NORM_OVERALL)	-1.54339	0.521147	0.00308306		333	EGFR MDRD	log(WEIGHT_FINAL_NORM_OVERALL)	-3.25484	1.31308	0.0132327
334	EGFR MDRD	CENTERC	-7.71895	2.1079	0.000254276		334	EGFR MDRD	CENTERC	-18.7846	5.31105	0.000410467
335	EGFR MDRD	CENTERM	-7.75112	4.58415	0.0909597		335	EGFR MDRD	CENTERM	-20.7886	11.5502	0.0719762
336	EGFR MDRD	CENTERS	-4.26923	2.14343	0.0464785		336	EGFR MDRD	CENTERS	-10.7143	5.40058	0.0473479
337	EGFR MDRD	Education2	-1.38446	0.927491	0.135614		337	EGFR MDRD	Education2	-3.27197	2.3369	0.161567
338	EGFR MDRD	Education3	-2.65081	0.903107	0.00335627		338	EGFR MDRD	Education3	-6.73516	2.27546	0.00309923
339	EGFR MDRD	US_BORN	-0.176356	1.19399	0.882586		339	EGFR MDRD	US_BORN	-0.0308178	3.00837	0.991827
340	EGFR MDRD	num_us_parents	-1.72434	1.05222	0.101358		340	EGFR MDRD	num_us_parents	-4.08819	2.65117	0.123162
341	Age at natural menopause	AI	-1.57073	1.41041	0.266023		341	Age at natural menopause	AI	-21.2196	18.4883	0.251696
342	Age at natural menopause	birth_year	-0.11696	0.0304252	0.000138528		342	Age at natural menopause	birth_year	-1.91726	0.398827	2.09519e-06
343	Age at natural menopause	log(WEIGHT_FINAL_NORM_OVERALL)	0.453305	0.326442	0.16564		343	Age at natural menopause	log(WEIGHT_FINAL_NORM_OVERALL)	5.22502	4.27915	0.222716
344	Age at natural menopause	CENTERC	-0.508888	1.71923	0.767369		344	Age at natural menopause	CENTERC	-4.36365	22.5364	0.846556
345	Age at natural menopause	CENTERM	-5.88077	2.94125	0.0461701		345	Age at natural menopause	CENTERM	-63.6355	38.5553	0.0995446
346	Age at natural menopause	CENTERS	-0.422613	1.71341	0.805293		346	Age at natural menopause	CENTERS	-2.08236	22.4602	0.926173
347	Age at natural menopause	Education2	0.665263	0.574928	0.247841		347	Age at natural menopause	Education2	11.2325	7.53641	0.136816
348	Age at natural menopause	Education3	0.653874	0.481949	0.175554		348	Age at natural menopause	Education3	8.22759	6.3176	0.193477
349	Age at natural menopause	US_BORN	-0.0574426	0.996155	0.954042		349	Age at natural menopause	US_BORN	2.02446	13.0581	0.876864
350	Age at natural menopause	num_us_parents	0.552285	0.71919	0.442938		350	Age at natural menopause	num_us_parents	4.05871	9.42747	0.667026
351	Total cholesterol	AI	-9.84499	4.74918	0.0382444		351	Total cholesterol	AI	-13.2603	6.5172	0.0419579
352	Total cholesterol	birth_year	-0.634601	0.0635764	3.65248e-23		352	Total cholesterol	birth_year	-0.807963	0.0872445	3.38845e-20
353	Total cholesterol	GENDER	4.85229	1.43005	0.000698527		353	Total cholesterol	GENDER	6.63082	1.96242	0.000735506
354	Total cholesterol	log(WEIGHT_FINAL_NORM_OVERALL)	-0.775153	0.983702	0.430751		354	Total cholesterol	log(WEIGHT_FINAL_NORM_OVERALL)	-1.23463	1.34991	0.360463
355	Total cholesterol	CENTERC	-3.44679	4.07878	0.398136		355	Total cholesterol	CENTERC	-4.30451	5.59722	0.441917
356	Total cholesterol	CENTERM	9.88957	9.00925	0.272403		356	Total cholesterol	CENTERM	14.306	12.3632	0.24729
357	Total cholesterol	CENTERS	0.790069	4.15096	0.849058		357	Total cholesterol	CENTERS	1.42209	5.69627	0.80287
358	Total cholesterol	Education2	0.82731	1.74965	0.636353		358	Total cholesterol	Education2	0.770284	2.401	0.748367
359	Total cholesterol	Education3	3.30062	1.69951	0.0522021		359	Total cholesterol	Education3	4.26391	2.33219	0.0675894
360	Total cholesterol	US_BORN	-11.283	2.22457	4.13542e-07		360	Total cholesterol	US_BORN	-14.201	3.05272	3.40693e-06
361	Total cholesterol	num_us_parents	0.278548	1.95683	0.886814		361	Total cholesterol	num_us_parents	1.26383	2.68531	0.637922
362	HDL cholesterol	AI	-6.81713	1.41726	1.5705e-06		362	HDL cholesterol	AI	-30.6531	6.41752	1.85507e-06
363	HDL cholesterol	birth_year	-0.0354902	0.0189731	0.0614882		363	HDL cholesterol	birth_year	-0.155448	0.0859125	0.0704767
364	HDL cholesterol	GENDER	-6.99344	0.426844	3.01843e-58		364	HDL cholesterol	GENDER	-30.8948	1.9328	1.28218e-55
365	HDL cholesterol	log(WEIGHT_FINAL_NORM_OVERALL)	-0.20447	0.293561	0.486151		365	HDL cholesterol	log(WEIGHT_FINAL_NORM_OVERALL)	-1.15159	1.32928	0.386367
366	HDL cholesterol	CENTERC	-2.54853	1.21721	0.0363526		366	HDL cholesterol	CENTERC	-11.6377	5.51167	0.0348011
367	HDL cholesterol	CENTERM	0.124476	2.68856	0.963075		367	HDL cholesterol	CENTERM	0.0102338	12.1741	0.999329
368	HDL cholesterol	CENTERS	-1.21324	1.23874	0.327439		368	HDL cholesterol	CENTERS	-5.73811	5.60915	0.306381
369	HDL cholesterol	Education2	0.480474	0.522166	0.357553		369	HDL cholesterol	Education2	2.48881	2.36443	0.292592
370	HDL cholesterol	Education3	0.703461	0.507197	0.16554		370	HDL cholesterol	Education3	3.03599	2.29664	0.186277
371	HDL cholesterol	US_BORN	-0.566326	0.66386	0.393671		371	HDL cholesterol	US_BORN	-2.44295	3.00603	0.416454
372	HDL cholesterol	num_us_parents	1.11619	0.583961	0.05603		372	HDL cholesterol	num_us_parents	5.6133	2.64424	0.0338352
373	Triglycerides	AI	45.5082	12.8138	0.000387963		373	Triglycerides	AI	33.1688	6.49854	3.49647e-07
374	Triglycerides	birth_year	-0.957272	0.171537	2.57394e-08		374	Triglycerides	birth_year	-0.793672	0.0869947	1.18382e-19
375	Triglycerides	GENDER	33.548	3.85843	5.19326e-18		375	Triglycerides	GENDER	18.2399	1.9568	1.94683e-20
376	Triglycerides	log(WEIGHT_FINAL_NORM_OVERALL)	-2.04068	2.65414	0.442022		376	Triglycerides	log(WEIGHT_FINAL_NORM_OVERALL)	-0.73588	1.34605	0.584621
377	Triglycerides	CENTERC	19.8509	11.005	0.0713456		377	Triglycerides	CENTERC	11.7851	5.58119	0.0347908
378	Triglycerides	CENTERM	39.3646	24.308	0.105447		378	Triglycerides	CENTERM	23.3784	12.3278	0.0579871
379	Triglycerides	CENTERS	20.7698	11.1998	0.0637511		379	Triglycerides	CENTERS	12.8503	5.67996	0.0237323
380	Triglycerides	Education2	-14.0715	4.72075	0.00289442		380	Triglycerides	Education2	-6.67216	2.39413	0.00534954
381	Triglycerides	Education3	-8.06632	4.58546	0.0786441		381	Triglycerides	Education3	-4.63402	2.32552	0.0463714
382	Triglycerides	US_BORN	-5.16559	6.00213	0.389502		382	Triglycerides	US_BORN	-2.3123	3.04398	0.447526
383	Triglycerides	num_us_parents	3.72399	5.27975	0.480647		383	Triglycerides	num_us_parents	-0.994359	2.67762	0.710392
384	LDL cholesterol	AI	-11.538	4.07175	0.00462798		384	LDL cholesterol	AI	-18.5375	6.66132	0.00541712
385	LDL cholesterol	birth_year	-0.416885	0.054295	2.07847e-14		385	LDL cholesterol	birth_year	-0.641195	0.0888256	6.40813e-13
386	LDL cholesterol	GENDER	6.5835	1.22706	8.60612e-08		386	LDL cholesterol	GENDER	10.5874	2.00745	1.41502e-07
387	LDL cholesterol	log(WEIGHT_FINAL_NORM_OVERALL)	-0.327137	0.840395	0.697103		387	LDL cholesterol	log(WEIGHT_FINAL_NORM_OVERALL)	-0.612008	1.37487	0.656247
388	LDL cholesterol	CENTERC	-4.24679	3.465	0.220423		388	LDL cholesterol	CENTERC	-6.26383	5.66868	0.269241
389	LDL cholesterol	CENTERM	-1.03625	7.87597	0.895331		389	LDL cholesterol	CENTERM	-1.07492	12.8849	0.933519
390	LDL cholesterol	CENTERS	-1.26433	3.52931	0.720187		390	LDL cholesterol	CENTERS	-1.23455	5.77388	0.830703
391	LDL cholesterol	Education2	3.04603	1.49676	0.0419173		391	LDL cholesterol	Education2	4.69541	2.44867	0.0552509
392	LDL cholesterol	Education3	3.87562	1.45503	0.00776631		392	LDL cholesterol	Education3	6.28987	2.38041	0.0082698
393	LDL cholesterol	US_BORN	-9.93737	1.90501	1.92956e-07		393	LDL cholesterol	US_BORN	-14.9011	3.11657	1.81353e-06
394	LDL cholesterol	num_us_parents	-0.463327	1.6822	0.783002		394	LDL cholesterol	num_us_parents	0.399697	2.75205	0.884533
395	Average sleep duration	AI	-0.361257	0.154104	0.0191215		395	Average sleep duration	AI	-10.7576	6.7771	0.112524
396	Average sleep duration	birth_year	0.00663082	0.00205141	0.00123928		396	Average sleep duration	birth_year	0.349009	0.0902159	0.000111454
397	Average sleep duration	GENDER	-0.289732	0.0462652	4.25041e-10		397	Average sleep duration	GENDER	-11.4316	2.03462	2.07604e-08
398	Average sleep duration	log(WEIGHT_FINAL_NORM_OVERALL)	0.0638525	0.0316754	0.0438932		398	Average sleep duration	log(WEIGHT_FINAL_NORM_OVERALL)	2.12999	1.393	0.12634
399	Average sleep duration	CENTERC	0.140482	0.135376	0.299474		399	Average sleep duration	CENTERC	6.62128	5.95347	0.266141
400	Average sleep duration	CENTERM	-0.140717	0.29431	0.632591		400	Average sleep duration	CENTERM	-2.69287	12.943	0.835197
401	Average sleep duration	CENTERS	0.0593594	0.137581	0.666168		401	Average sleep duration	CENTERS	4.57688	6.05047	0.44943
402	Average sleep duration	Education2	-0.0867254	0.0565137	0.124975		402	Average sleep duration	Education2	-4.92899	2.48533	0.0474191
403	Average sleep duration	Education3	-0.24025	0.054906	1.24594e-05		403	Average sleep duration	Education3	-12.1094	2.41463	5.56558e-07
404	Average sleep duration	US_BORN	0.114015	0.0718636	0.112705		404	Average sleep duration	US_BORN	5.74449	3.16038	0.0692017
405	Average sleep duration	num_us_parents	0.0300296	0.0630732	0.634028		405	Average sleep duration	num_us_parents	1.70358	2.7738	0.539144
406	Heart rate, ventricular	AI	-3.05174	1.02393	0.00289778		406	Heart rate, ventricular	AI	-21.4002	6.64563	0.00129252
407	Heart rate, ventricular	birth_year	0.0108499	0.0136695	0.427403		407	Heart rate, ventricular	birth_year	0.0731443	0.0887196	0.409742
408	Heart rate, ventricular	GENDER	-1.80375	0.308012	5.16646e-09		408	Heart rate, ventricular	GENDER	-11.4761	1.99911	1.02169e-08
409	Heart rate, ventricular	log(WEIGHT_FINAL_NORM_OVERALL)	0.116805	0.211514	0.580821		409	Heart rate, ventricular	log(WEIGHT_FINAL_NORM_OVERALL)	0.924946	1.3728	0.500503
410	Heart rate, ventricular	CENTERC	3.2178	0.875622	0.000241456		410	Heart rate, ventricular	CENTERC	20.5827	5.68309	0.000296682
411	Heart rate, ventricular	CENTERM	2.47977	1.93228	0.199457		411	Heart rate, ventricular	CENTERM	16.0086	12.5412	0.201867
412	Heart rate, ventricular	CENTERS	0.717129	0.891023	0.420966		412	Heart rate, ventricular	CENTERS	4.3164	5.78305	0.455482
413	Heart rate, ventricular	Education2	-1.07524	0.376516	0.0043182		413	Heart rate, ventricular	Education2	-7.36171	2.44372	0.00260918
414	Heart rate, ventricular	Education3	-1.01928	0.366007	0.00538317		414	Heart rate, ventricular	Education3	-7.1164	2.37551	0.00275663
415	Heart rate, ventricular	US_BORN	2.22076	0.477683	3.45553e-06		415	Heart rate, ventricular	US_BORN	14.1114	3.10033	5.50175e-06
416	Heart rate, ventricular	num_us_parents	0.237482	0.420862	0.572602		416	Heart rate, ventricular	num_us_parents	2.12794	2.73154	0.436015
417	Iron	AI	2.50854	3.89316	0.519392		417	Iron	AI	4.82965	6.35127	0.447052
418	Iron	birth_year	0.0159935	0.0521434	0.759074		418	Iron	birth_year	0.0549757	0.0850663	0.518147
419	Iron	GENDER	25.1603	1.17236	2.9927e-96		419	Iron	GENDER	39.5222	1.91258	9.56904e-90
420	Iron	log(WEIGHT_FINAL_NORM_OVERALL)	-0.691737	0.806356	0.391029		420	Iron	log(WEIGHT_FINAL_NORM_OVERALL)	-1.26884	1.31548	0.334838
421	Iron	CENTERC	-4.29601	3.34311	0.198863		421	Iron	CENTERC	-6.28224	5.45392	0.249449
422	Iron	CENTERM	-0.560171	7.3841	0.939533		422	Iron	CENTERM	1.66035	12.0464	0.890382
423	Iron	CENTERS	1.16553	3.4022	0.731934		423	Iron	CENTERS	2.46805	5.55032	0.656586
424	Iron	Education2	1.097	1.43448	0.444479		424	Iron	Education2	1.48435	2.34019	0.525934
425	Iron	Education3	2.50491	1.39306	0.0722394		425	Iron	Education3	3.37396	2.27263	0.137736
426	Iron	US_BORN	-3.62772	1.82533	0.0469498		426	Iron	US_BORN	-5.33547	2.97782	0.0732594
427	Iron	num_us_parents	0.672104	1.60467	0.675357		427	Iron	num_us_parents	0.963057	2.61785	0.712983
428	Total iron binding capacity	AI	19.9456	5.64341	0.000413961		428	Total iron binding capacity	AI	22.2811	6.51327	0.000631131
429	Total iron binding capacity	birth_year	0.400359	0.0755855	1.24932e-07		429	Total iron binding capacity	birth_year	0.459132	0.0872362	1.49925e-07
430	Total iron binding capacity	GENDER	-22.7204	1.69942	7.9845e-40		430	Total iron binding capacity	GENDER	-26.1461	1.96137	1.31396e-39
431	Total iron binding capacity	log(WEIGHT_FINAL_NORM_OVERALL)	-0.144653	1.16887	0.901517		431	Total iron binding capacity	log(WEIGHT_FINAL_NORM_OVERALL)	-0.228217	1.34904	0.865672
432	Total iron binding capacity	CENTERC	-2.09141	4.84607	0.666081		432	Total iron binding capacity	CENTERC	-2.66162	5.59304	0.634189
433	Total iron binding capacity	CENTERM	25.7073	10.7038	0.0163692		433	Total iron binding capacity	CENTERM	27.176	12.3536	0.0278816
434	Total iron binding capacity	CENTERS	0.643644	4.93173	0.89617		434	Total iron binding capacity	CENTERS	0.356104	5.6919	0.950118
435	Total iron binding capacity	Education2	0.374193	2.07937	0.857198		435	Total iron binding capacity	Education2	0.484623	2.39989	0.839978
436	Total iron binding capacity	Education3	-4.34204	2.01934	0.0316037		436	Total iron binding capacity	Education3	-3.8648	2.3306	0.0973463
437	Total iron binding capacity	US_BORN	-0.734097	2.64594	0.781456		437	Total iron binding capacity	US_BORN	-1.71544	3.05378	0.574325
438	Total iron binding capacity	num_us_parents	-1.50839	2.32608	0.516724		438	Total iron binding capacity	num_us_parents	-1.11159	2.68462	0.678856
439	% Transferrin saturation	AI	-0.67467	1.3232	0.610167		439	% Transferrin saturation	AI	-1.16877	6.26128	0.851933
440	% Transferrin saturation	birth_year	-0.0243131	0.0177224	0.170183		440	% Transferrin saturation	birth_year	-0.077612	0.083861	0.354776
441	% Transferrin saturation	GENDER	9.54842	0.398459	7.10528e-118		441	% Transferrin saturation	GENDER	43.4956	1.88548	6.11836e-110
442	% Transferrin saturation	log(WEIGHT_FINAL_NORM_OVERALL)	-0.232387	0.274062	0.396531		442	% Transferrin saturation	log(WEIGHT_FINAL_NORM_OVERALL)	-1.10497	1.29684	0.394244
443	% Transferrin saturation	CENTERC	-1.04272	1.13625	0.358843		443	% Transferrin saturation	CENTERC	-4.30974	5.37665	0.422857
444	% Transferrin saturation	CENTERM	-1.90424	2.50969	0.448047		444	% Transferrin saturation	CENTERM	-6.29378	11.8757	0.596163
445	% Transferrin saturation	CENTERS	0.519768	1.15633	0.6531		445	% Transferrin saturation	CENTERS	3.54923	5.47168	0.516603
446	% Transferrin saturation	Education2	0.292939	0.487546	0.547982		446	% Transferrin saturation	Education2	0.889241	2.30703	0.699928
447	% Transferrin saturation	Education3	1.24228	0.47347	0.00873296		447	% Transferrin saturation	Education3	5.046	2.24043	0.0243666
448	% Transferrin saturation	US_BORN	-1.20011	0.620387	0.053136		448	% Transferrin saturation	US_BORN	-5.21415	2.93563	0.0757909
449	% Transferrin saturation	num_us_parents	0.314976	0.545391	0.563622		449	% Transferrin saturation	num_us_parents	1.04113	2.58075	0.686662
450	Ferritin	AI	-29.3698	16.1341	0.0687887		450	Ferritin	AI	-7.66156	5.68881	0.178138
451	Ferritin	birth_year	-1.59843	0.215436	1.46307e-13		451	Ferritin	birth_year	-0.761442	0.0759617	2.43667e-23
452	Ferritin	GENDER	132.388	4.84307	1.81686e-149		452	Ferritin	GENDER	60.9248	1.70765	1.65425e-238
453	Ferritin	log(WEIGHT_FINAL_NORM_OVERALL)	2.94431	3.34631	0.378991		453	Ferritin	log(WEIGHT_FINAL_NORM_OVERALL)	0.999154	1.17989	0.397155
454	Ferritin	CENTERC	9.17183	13.8738	0.508597		454	Ferritin	CENTERC	5.94233	4.89184	0.224545
455	Ferritin	CENTERM	41.0316	30.8584	0.183711		455	Ferritin	CENTERM	12.7361	10.8806	0.241862
456	Ferritin	CENTERS	-4.82547	14.1175	0.732515		456	Ferritin	CENTERS	2.26803	4.97776	0.648682
457	Ferritin	Education2	0.373399	5.93296	0.949821		457	Ferritin	Education2	-0.723259	2.09194	0.729561
458	Ferritin	Education3	7.42512	5.77002	0.198232		458	Ferritin	Education3	2.39075	2.03448	0.240028
459	Ferritin	US_BORN	6.809	7.53394	0.366175		459	Ferritin	US_BORN	2.33992	2.65644	0.37846
460	Ferritin	num_us_parents	3.98659	6.62534	0.5474		460	Ferritin	num_us_parents	2.45927	2.33607	0.292532
461	% Fat	AI	1.4515	0.889768	0.10291		461	% Fat	AI	6.57759	5.85146	0.261048
462	% Fat	birth_year	-0.103777	0.0119145	4.55734e-18		462	% Fat	birth_year	-0.532977	0.0783547	1.20313e-11
463	% Fat	GENDER	-9.75773	0.268003	3.08589e-247		463	% Fat	GENDER	-53.2149	1.7625	1.27655e-178
464	% Fat	log(WEIGHT_FINAL_NORM_OVERALL)	-0.624985	0.184073	0.000692981		464	% Fat	log(WEIGHT_FINAL_NORM_OVERALL)	-3.62886	1.21054	0.00273869
465	% Fat	CENTERC	0.0336444	0.770772	0.965186		465	% Fat	CENTERC	1.98792	5.0689	0.694949
466	% Fat	CENTERM	1.45797	1.68605	0.387247		466	% Fat	CENTERM	10.6191	11.0881	0.338276
467	% Fat	CENTERS	1.0109	0.784192	0.197447		467	% Fat	CENTERS	8.1795	5.15715	0.112816
468	% Fat	Education2	-0.369139	0.327765	0.260143		468	% Fat	Education2	-2.38004	2.15551	0.269595
469	% Fat	Education3	-0.0778046	0.318196	0.806844		469	% Fat	Education3	-1.38402	2.09258	0.508404
470	% Fat	US_BORN	1.20252	0.416765	0.003933		470	% Fat	US_BORN	9.04831	2.74081	0.000971707
471	% Fat	num_us_parents	0.115797	0.366308	0.75193		471	% Fat	num_us_parents	1.14516	2.40899	0.634552
472	QRS duration	AI	0.776307	1.30964	0.553376		472	QRS duration	AI	4.46313	6.09823	0.464294
473	QRS duration	birth_year	-0.0666606	0.0174838	0.000139762		473	QRS duration	birth_year	-0.22154	0.0814118	0.00653549
474	QRS duration	GENDER	8.41048	0.393959	2.7707e-95		474	QRS duration	GENDER	41.9132	1.83444	5.71165e-108
475	QRS duration	log(WEIGHT_FINAL_NORM_OVERALL)	0.158526	0.270534	0.557929		475	QRS duration	log(WEIGHT_FINAL_NORM_OVERALL)	0.461637	1.25972	0.714043
476	QRS duration	CENTERC	-2.86201	1.11995	0.0106454		476	QRS duration	CENTERC	-13.3132	5.21498	0.010725
477	QRS duration	CENTERM	-3.21245	2.47146	0.193746		477	QRS duration	CENTERM	-16.7077	11.5082	0.14664
478	QRS duration	CENTERS	-7.97784	1.13965	3.03756e-12		478	QRS duration	CENTERS	-38.2501	5.3067	6.89838e-13
479	QRS duration	Education2	-0.116585	0.481578	0.808725		479	QRS duration	Education2	-1.28455	2.24243	0.56679
480	QRS duration	Education3	0.138751	0.468136	0.76695		480	QRS duration	Education3	0.139824	2.17984	0.948859
481	QRS duration	US_BORN	1.78432	0.610974	0.00351713		481	QRS duration	US_BORN	8.18596	2.84496	0.00403391
482	QRS duration	num_us_parents	0.103439	0.538298	0.847628		482	QRS duration	num_us_parents	-0.0533795	2.50654	0.983011
483	QT duration	AI	9.21717	3.13858	0.00333807		483	QT duration	AI	17.3464	6.46749	0.00735008
484	QT duration	birth_year	-0.447397	0.0419003	3.19987e-26		484	QT duration	birth_year	-0.866404	0.0863414	2.18166e-23
485	QT duration	GENDER	-11.2392	0.944133	4.49666e-32		485	QT duration	GENDER	-21.4672	1.94552	7.31562e-28
486	QT duration	log(WEIGHT_FINAL_NORM_OVERALL)	0.232492	0.648341	0.719919		486	QT duration	log(WEIGHT_FINAL_NORM_OVERALL)	0.585281	1.336	0.661351
487	QT duration	CENTERC	-8.64464	2.684	0.00128973		487	QT duration	CENTERC	-16.3857	5.53075	0.00307007
488	QT duration	CENTERM	-5.38839	5.92291	0.363014		488	QT duration	CENTERM	-11.4302	12.205	0.349067
489	QT duration	CENTERS	-8.36155	2.7312	0.00221874		489	QT duration	CENTERS	-16.2966	5.62803	0.00380699
490	QT duration	Education2	2.0887	1.15411	0.0704131		490	QT duration	Education2	4.69352	2.37822	0.0485102
491	QT duration	Education3	3.07597	1.1219	0.00614162		491	QT duration	Education3	6.12173	2.31183	0.00813256
492	QT duration	US_BORN	-4.89529	1.46422	0.000836447		492	QT duration	US_BORN	-9.74047	3.01722	0.00125657
493	QT duration	num_us_parents	1.94312	1.29004	0.132093		493	QT duration	num_us_parents	4.92823	2.65832	0.0638371
494	FEV1 FVC Ratio	AI	2.93185	0.660387	9.29221e-06		494	FEV1 FVC Ratio	AI	28.9277	6.2293	3.54657e-06
495	FEV1 FVC Ratio	birth_year	0.162459	0.00886261	9.90528e-72		495	FEV1 FVC Ratio	birth_year	1.50813	0.0835992	1.25945e-69
496	FEV1 FVC Ratio	GENDER	-2.19649	0.197722	3.35374e-28		496	FEV1 FVC Ratio	GENDER	-18.8089	1.86507	1.35374e-23
497	FEV1 FVC Ratio	log(WEIGHT_FINAL_NORM_OVERALL)	-0.125133	0.136175	0.358203		497	FEV1 FVC Ratio	log(WEIGHT_FINAL_NORM_OVERALL)	-0.519691	1.28451	0.685809
498	FEV1 FVC Ratio	CENTERC	0.509366	0.572424	0.373613		498	FEV1 FVC Ratio	CENTERC	6.23562	5.39957	0.248236
499	FEV1 FVC Ratio	CENTERM	2.25403	1.25419	0.0723893		499	FEV1 FVC Ratio	CENTERM	20.3763	11.8305	0.0850942
500	FEV1 FVC Ratio	CENTERS	0.779897	0.583034	0.181097		500	FEV1 FVC Ratio	CENTERS	7.69332	5.49965	0.161939
501	FEV1 FVC Ratio	Education2	0.284148	0.241867	0.24015		501	FEV1 FVC Ratio	Education2	2.31971	2.28148	0.309341
502	FEV1 FVC Ratio	Education3	0.328594	0.235392	0.16282		502	FEV1 FVC Ratio	Education3	2.99551	2.2204	0.177397
503	FEV1 FVC Ratio	US_BORN	0.787506	0.309586	0.0110101		503	FEV1 FVC Ratio	US_BORN	12.9275	2.92026	9.85653e-06
504	FEV1 FVC Ratio	num_us_parents	-0.289436	0.27133	0.286167		504	FEV1 FVC Ratio	num_us_parents	-4.63119	2.5594	0.0704618
505	PR duration	AI	1.17251	2.35072	0.617958		505	PR duration	AI	2.741	6.58184	0.677107
506	PR duration	birth_year	-0.263251	0.0314311	7.79975e-17		506	PR duration	birth_year	-0.73805	0.0880048	7.11828e-17
507	PR duration	GENDER	7.37071	0.70749	4.66699e-25		507	PR duration	GENDER	20.4354	1.98092	1.31512e-24
508	PR duration	log(WEIGHT_FINAL_NORM_OVERALL)	0.108369	0.485767	0.82348		508	PR duration	log(WEIGHT_FINAL_NORM_OVERALL)	0.417448	1.36011	0.758921
509	PR duration	CENTERC	-0.456737	2.01019	0.820273		509	PR duration	CENTERC	-0.727148	5.6284	0.897212
510	PR duration	CENTERM	-3.37513	4.43554	0.446751		510	PR duration	CENTERM	-8.39934	12.4192	0.498882
511	PR duration	CENTERS	0.585333	2.04542	0.774766		511	PR duration	CENTERS	2.02883	5.72703	0.723168
512	PR duration	Education2	0.409666	0.864905	0.635775		512	PR duration	Education2	1.12358	2.42167	0.6427
513	PR duration	Education3	1.49636	0.840823	0.07522		513	PR duration	Education3	3.7908	2.35424	0.107443
514	PR duration	US_BORN	-0.706469	1.09712	0.519662		514	PR duration	US_BORN	-1.29728	3.07186	0.672824
515	PR duration	num_us_parents	-0.689335	0.966349	0.475682		515	PR duration	num_us_parents	-2.5704	2.70571	0.342181
516	Heart rate, atrial	AI	-2.8015	1.24557	0.0245623		516	Heart rate, atrial	AI	-18.8722	6.65934	0.00462347
517	Heart rate, atrial	birth_year	-0.00421966	0.0166262	0.799668		517	Heart rate, atrial	birth_year	0.0448701	0.0888908	0.613746
518	Heart rate, atrial	GENDER	-1.60232	0.374678	1.94789e-05		518	Heart rate, atrial	GENDER	-11.1396	2.00319	2.87962e-08
519	Heart rate, atrial	log(WEIGHT_FINAL_NORM_OVERALL)	0.137782	0.25747	0.592586		519	Heart rate, atrial	log(WEIGHT_FINAL_NORM_OVERALL)	0.87259	1.37654	0.526186
520	Heart rate, atrial	CENTERC	3.20448	1.0646	0.00263046		520	Heart rate, atrial	CENTERC	20.4559	5.69181	0.000330131
521	Heart rate, atrial	CENTERM	2.54038	2.34894	0.279548		521	Heart rate, atrial	CENTERM	15.9956	12.5584	0.202854
522	Heart rate, atrial	CENTERS	0.851	1.08345	0.432242		522	Heart rate, atrial	CENTERS	4.695	5.79261	0.417697
523	Heart rate, atrial	Education2	-1.15066	0.457856	0.0120097		523	Heart rate, atrial	Education2	-6.89787	2.44789	0.00486065
524	Heart rate, atrial	Education3	-1.2315	0.445279	0.0057094		524	Heart rate, atrial	Education3	-7.14674	2.38065	0.00270053
525	Heart rate, atrial	US_BORN	2.34384	0.581128	5.61576e-05		525	Heart rate, atrial	US_BORN	14.2622	3.10696	4.57579e-06
526	Heart rate, atrial	num_us_parents	0.0732865	0.511703	0.886124		526	Heart rate, atrial	num_us_parents	1.33354	2.73578	0.625974
527	% neutrophils	AI	-4.00113	1.2165	0.00101539		527	% neutrophils	AI	-22.4686	6.85343	0.00105424
528	% neutrophils	birth_year	0.00155984	0.0160619	0.922641		528	% neutrophils	birth_year	-0.0262878	0.0904886	0.771444
529	% neutrophils	GENDER	-2.87382	0.364467	4.19465e-15		529	% neutrophils	GENDER	-14.6733	2.05331	1.08545e-12
530	% neutrophils	log(WEIGHT_FINAL_NORM_OVERALL)	0.178413	0.249202	0.47408		530	% neutrophils	log(WEIGHT_FINAL_NORM_OVERALL)	1.12858	1.40394	0.421531
531	% neutrophils	CENTERC	-1.06491	1.03554	0.303853		531	% neutrophils	CENTERC	-3.53374	5.83398	0.544743
532	% neutrophils	CENTERM	-4.49637	2.31545	0.0522312		532	% neutrophils	CENTERM	-16.1977	13.0446	0.214427
533	% neutrophils	CENTERS	1.10174	1.05235	0.295204		533	% neutrophils	CENTERS	5.72851	5.92865	0.333992
534	% neutrophils	Education2	0.682465	0.445149	0.12534		534	% neutrophils	Education2	2.30369	2.50785	0.358375
535	% neutrophils	Education3	0.54582	0.429856	0.204251		535	% neutrophils	Education3	2.39111	2.4217	0.32353
536	% neutrophils	US_BORN	0.381722	0.559681	0.495263		536	% neutrophils	US_BORN	2.55167	3.1531	0.418424
537	% neutrophils	num_us_parents	-1.0265	0.49018	0.0363226		537	% neutrophils	num_us_parents	-5.65695	2.76155	0.0405901
538	% Lymphocytes	AI	3.80153	1.05784	0.000330626		538	% Lymphocytes	AI	24.1493	6.88994	0.000462459
539	% Lymphocytes	birth_year	0.00677839	0.013967	0.627485		539	% Lymphocytes	birth_year	0.0329031	0.0909707	0.717606
540	% Lymphocytes	GENDER	0.946624	0.316931	0.00283874		540	% Lymphocytes	GENDER	6.68971	2.06425	0.0012036
541	% Lymphocytes	log(WEIGHT_FINAL_NORM_OVERALL)	-0.0886579	0.2167	0.682471		541	% Lymphocytes	log(WEIGHT_FINAL_NORM_OVERALL)	-0.505864	1.41142	0.72006
542	% Lymphocytes	CENTERC	0.305552	0.900482	0.734389		542	% Lymphocytes	CENTERC	2.68477	5.86506	0.647157
543	% Lymphocytes	CENTERM	2.62357	2.01345	0.192656		543	% Lymphocytes	CENTERM	18.4964	13.1141	0.158507
544	% Lymphocytes	CENTERS	-1.17983	0.915094	0.197382		544	% Lymphocytes	CENTERS	-6.57484	5.96023	0.270054
545	% Lymphocytes	Education2	-0.328445	0.38709	0.39622		545	% Lymphocytes	Education2	-2.13861	2.52121	0.39636
546	% Lymphocytes	Education3	-0.298097	0.373792	0.42522		546	% Lymphocytes	Education3	-2.1777	2.4346	0.371128
547	% Lymphocytes	US_BORN	-0.687874	0.486684	0.157632		547	% Lymphocytes	US_BORN	-5.39215	3.16989	0.0890241
548	% Lymphocytes	num_us_parents	0.761133	0.426248	0.0742433		548	% Lymphocytes	num_us_parents	6.52938	2.77626	0.018736
549	% Monocytes	AI	-0.268985	0.272636	0.323906		549	% Monocytes	AI	-6.89127	6.64528	0.299801
550	% Monocytes	birth_year	-0.00115192	0.00359976	0.748988		550	% Monocytes	birth_year	-0.0322515	0.0877412	0.713212
551	% Monocytes	GENDER	1.18001	0.0816774	5.71001e-46		551	% Monocytes	GENDER	28.7178	1.99082	7.72262e-46
552	% Monocytes	log(WEIGHT_FINAL_NORM_OVERALL)	0.0551613	0.0558346	0.323251		552	% Monocytes	log(WEIGHT_FINAL_NORM_OVERALL)	1.45202	1.36092	0.286075
553	% Monocytes	CENTERC	0.316474	0.232063	0.172737		553	% Monocytes	CENTERC	7.06809	5.65633	0.211535
554	% Monocytes	CENTERM	0.956112	0.518933	0.0654947		554	% Monocytes	CENTERM	22.0221	12.6486	0.0817604
555	% Monocytes	CENTERS	-0.0490024	0.235849	0.835421		555	% Monocytes	CENTERS	-1.25323	5.74863	0.827439
556	% Monocytes	Education2	-0.385531	0.0997659	0.000113446		556	% Monocytes	Education2	-9.81557	2.43171	5.54445e-05
557	% Monocytes	Education3	-0.213326	0.0963065	0.0268208		557	% Monocytes	Education3	-5.42169	2.34739	0.0209658
558	% Monocytes	US_BORN	0.282502	0.125421	0.0243587		558	% Monocytes	US_BORN	6.72467	3.05704	0.0278925
559	% Monocytes	num_us_parents	0.0953531	0.109858	0.385475		559	% Monocytes	num_us_parents	2.06265	2.6777	0.441171
560	% Eosinophils	AI	0.518532	0.253154	0.0406081		560	% Eosinophils	AI	12.7787	6.67021	0.0554761
561	% Eosinophils	birth_year	-0.00521807	0.00334363	0.11871		561	% Eosinophils	birth_year	-0.159452	0.0880994	0.0703977
562	% Eosinophils	GENDER	0.696488	0.0758437	7.0589e-20		562	% Eosinophils	GENDER	19.5353	1.99836	2.79454e-22
563	% Eosinophils	log(WEIGHT_FINAL_NORM_OVERALL)	-0.135036	0.0518434	0.00923557		563	% Eosinophils	log(WEIGHT_FINAL_NORM_OVERALL)	-3.7172	1.36599	0.00653655
564	% Eosinophils	CENTERC	0.477094	0.215474	0.0268835		564	% Eosinophils	CENTERC	12.3259	5.67741	0.0299968
565	% Eosinophils	CENTERM	0.949244	0.481836	0.0489125		565	% Eosinophils	CENTERM	24.7129	12.6956	0.0516682
566	% Eosinophils	CENTERS	0.317649	0.218989	0.147004		566	% Eosinophils	CENTERS	8.94691	5.77002	0.121094
567	% Eosinophils	Education2	0.0262954	0.0926386	0.776543		567	% Eosinophils	Education2	0.328835	2.44088	0.892841
568	% Eosinophils	Education3	-0.0742755	0.0894351	0.406316		568	% Eosinophils	Education3	-2.85045	2.35647	0.226507
569	% Eosinophils	US_BORN	0.0623885	0.116458	0.592189		569	% Eosinophils	US_BORN	1.26345	3.06848	0.680549
570	% Eosinophils	num_us_parents	0.11132	0.102008	0.275223		570	% Eosinophils	num_us_parents	4.38578	2.68775	0.102821
571	% Basophils	AI	-0.00705265	0.0650145	0.913623		571	% Basophils	AI	0.85126	5.80331	0.883389
572	% Basophils	birth_year	-0.00282316	0.000858129	0.00101236		572	% Basophils	birth_year	-0.253023	0.0765982	0.000965547
573	% Basophils	GENDER	0.0373515	0.0194671	0.0551054		573	% Basophils	GENDER	2.91348	1.73767	0.0936995
574	% Basophils	log(WEIGHT_FINAL_NORM_OVERALL)	0.00198957	0.013308	0.881166		574	% Basophils	log(WEIGHT_FINAL_NORM_OVERALL)	0.422955	1.18789	0.721821
575	% Basophils	CENTERC	0.000789221	0.0554478	0.988644		575	% Basophils	CENTERC	0.447715	4.94937	0.927928
576	% Basophils	CENTERM	0.0302531	0.123711	0.806821		576	% Basophils	CENTERM	0.132542	11.0426	0.990424
577	% Basophils	CENTERS	-0.0901696	0.0563352	0.10956		577	% Basophils	CENTERS	-8.14487	5.02859	0.105386
578	% Basophils	Education2	0.0121334	0.0237771	0.609874		578	% Basophils	Education2	1.03057	2.12239	0.627303
579	% Basophils	Education3	0.031801	0.0229701	0.16631		579	% Basophils	Education3	2.34619	2.05035	0.252585
580	% Basophils	US_BORN	-0.0200407	0.0298848	0.502522		580	% Basophils	US_BORN	-1.517	2.66758	0.569609
581	% Basophils	num_us_parents	0.0528724	0.0261762	0.0434751		581	% Basophils	num_us_parents	4.73592	2.33654	0.0427502
582	% Hematocrit	AI	-0.333057	0.370743	0.369059		582	% Hematocrit	AI	-0.925341	5.4422	0.864996
583	% Hematocrit	birth_year	0.00097117	0.00495739	0.844697		583	% Hematocrit	birth_year	0.0399398	0.0727705	0.583145
584	% Hematocrit	GENDER	4.91793	0.111534	0		584	% Hematocrit	GENDER	68.483	1.63722	0
585	% Hematocrit	log(WEIGHT_FINAL_NORM_OVERALL)	-0.018236	0.0768449	0.812431		585	% Hematocrit	log(WEIGHT_FINAL_NORM_OVERALL)	0.217739	1.12802	0.846948
586	% Hematocrit	CENTERC	0.57443	0.318255	0.071169		586	% Hematocrit	CENTERC	11.5203	4.67172	0.013711
587	% Hematocrit	CENTERM	0.280485	0.700661	0.688949		587	% Hematocrit	CENTERM	5.8511	10.2851	0.569467
588	% Hematocrit	CENTERS	0.206126	0.324021	0.524719		588	% Hematocrit	CENTERS	4.81663	4.75636	0.311285
589	% Hematocrit	Education2	0.248785	0.136425	0.0682951		589	% Hematocrit	Education2	3.13035	2.0026	0.118107
590	% Hematocrit	Education3	0.0961743	0.132361	0.467515		590	% Hematocrit	Education3	1.80621	1.94295	0.352629
591	% Hematocrit	US_BORN	-0.0208923	0.173056	0.903915		591	% Hematocrit	US_BORN	-1.06634	2.54032	0.674682
592	% Hematocrit	num_us_parents	0.110035	0.152447	0.470468		592	% Hematocrit	num_us_parents	1.55114	2.23779	0.488257
593	Mean corpuscular hemoglobin concentration	AI	0.20489	0.159837	0.19997		593	Mean corpuscular hemoglobin concentration	AI	16.3326	6.2538	0.00904905
594	Mean corpuscular hemoglobin concentration	birth_year	0.00343509	0.00213726	0.108089		594	Mean corpuscular hemoglobin concentration	birth_year	0.124265	0.0836228	0.137362
595	Mean corpuscular hemoglobin concentration	GENDER	1.05102	0.048085	1.60464e-99		595	Mean corpuscular hemoglobin concentration	GENDER	43.9608	1.88138	1.64535e-112
596	Mean corpuscular hemoglobin concentration	log(WEIGHT_FINAL_NORM_OVERALL)	-9.93612e-05	0.0331298	0.997607		596	Mean corpuscular hemoglobin concentration	log(WEIGHT_FINAL_NORM_OVERALL)	0.216033	1.29624	0.867646
597	Mean corpuscular hemoglobin concentration	CENTERC	-0.277024	0.137208	0.0435608		597	Mean corpuscular hemoglobin concentration	CENTERC	-6.56769	5.36843	0.221262
598	Mean corpuscular hemoglobin concentration	CENTERM	0.0165253	0.302073	0.956375		598	Mean corpuscular hemoglobin concentration	CENTERM	17.1255	11.819	0.14743
599	Mean corpuscular hemoglobin concentration	CENTERS	0.0689295	0.139694	0.621737		599	Mean corpuscular hemoglobin concentration	CENTERS	3.33331	5.46568	0.541993
600	Mean corpuscular hemoglobin concentration	Education2	-0.0835676	0.0588161	0.155454		600	Mean corpuscular hemoglobin concentration	Education2	-2.58269	2.30125	0.261811
601	Mean corpuscular hemoglobin concentration	Education3	-0.0392617	0.0570641	0.49148		601	Mean corpuscular hemoglobin concentration	Education3	-0.705792	2.2327	0.751933
602	Mean corpuscular hemoglobin concentration	US_BORN	-0.0366047	0.0746088	0.623724		602	Mean corpuscular hemoglobin concentration	US_BORN	-0.99923	2.91916	0.732145
603	Mean corpuscular hemoglobin concentration	num_us_parents	0.000580319	0.0657236	0.992956		603	Mean corpuscular hemoglobin concentration	num_us_parents	-0.0157972	2.57152	0.995099
604	% Red cell distribution width	AI	0.276199	0.139814	0.0482919		604	% Red cell distribution width	AI	11.0167	6.56715	0.0935228
605	% Red cell distribution width	birth_year	-0.0062764	0.00186953	0.000795561		605	% Red cell distribution width	birth_year	-0.406933	0.0878128	3.71264e-06
606	% Red cell distribution width	GENDER	-0.448248	0.0420616	3.96883e-26		606	% Red cell distribution width	GENDER	-21.649	1.97565	1.65641e-27
607	% Red cell distribution width	log(WEIGHT_FINAL_NORM_OVERALL)	-0.043375	0.0289797	0.13455		607	% Red cell distribution width	log(WEIGHT_FINAL_NORM_OVERALL)	-2.68147	1.36119	0.0489215
608	% Red cell distribution width	CENTERC	-0.0344018	0.12002	0.77441		608	% Red cell distribution width	CENTERC	-4.06409	5.63741	0.471009
609	% Red cell distribution width	CENTERM	0.0757932	0.264233	0.77425		609	% Red cell distribution width	CENTERM	-3.64402	12.4111	0.769074
610	% Red cell distribution width	CENTERS	-0.190405	0.122195	0.119272		610	% Red cell distribution width	CENTERS	-11.8071	5.73954	0.039744
611	% Red cell distribution width	Education2	-0.0506165	0.0514484	0.325266		611	% Red cell distribution width	Education2	-2.42737	2.41656	0.315218
612	% Red cell distribution width	Education3	-0.0514549	0.0499159	0.302689		612	% Red cell distribution width	Education3	-3.04622	2.34457	0.193938
613	% Red cell distribution width	US_BORN	0.00258274	0.0652628	0.968435		613	% Red cell distribution width	US_BORN	1.58587	3.06542	0.60495
614	% Red cell distribution width	num_us_parents	0.057338	0.0574907	0.318665		614	% Red cell distribution width	num_us_parents	2.98859	2.70036	0.268481
615	Glucose, fasting	AI	19.4915	4.29993	6.00468e-06		615	Glucose, fasting	AI	40.5423	6.31241	1.51442e-10
616	Glucose, fasting	birth_year	-0.560802	0.0575681	3.75285e-22		616	Glucose, fasting	birth_year	-1.31028	0.0845115	1.56042e-52
617	Glucose, fasting	GENDER	7.21885	1.29511	2.67339e-08		617	Glucose, fasting	GENDER	19.3575	1.90126	5.05927e-24
618	Glucose, fasting	log(WEIGHT_FINAL_NORM_OVERALL)	0.443748	0.890891	0.618448		618	Glucose, fasting	log(WEIGHT_FINAL_NORM_OVERALL)	0.39367	1.30785	0.763428
619	Glucose, fasting	CENTERC	6.10813	3.69345	0.0982604		619	Glucose, fasting	CENTERC	10.3047	5.42207	0.0574452
620	Glucose, fasting	CENTERM	6.60052	8.15699	0.418462		620	Glucose, fasting	CENTERM	8.1702	11.9747	0.495099
621	Glucose, fasting	CENTERS	4.04882	3.75839	0.281429		621	Glucose, fasting	CENTERS	9.70839	5.51741	0.078562
622	Glucose, fasting	Education2	-1.75352	1.5845	0.26851		622	Glucose, fasting	Education2	-5.60226	2.32608	0.0160703
623	Glucose, fasting	Education3	-2.56875	1.53874	0.0951275		623	Glucose, fasting	Education3	-6.94497	2.2589	0.00212444
624	Glucose, fasting	US_BORN	4.6936	2.01439	0.0198589		624	Glucose, fasting	US_BORN	6.71146	2.95717	0.0232936
625	Glucose, fasting	num_us_parents	1.20528	1.77174	0.496372		625	Glucose, fasting	num_us_parents	3.20487	2.60096	0.21796
626	Glucose, post OGTT	AI	24.3697	5.07899	1.68023e-06		626	Glucose, post OGTT	AI	34.0013	6.89927	8.74995e-07
627	Glucose, post OGTT	birth_year	-1.05532	0.0700697	1.83828e-49		627	Glucose, post OGTT	birth_year	-1.39547	0.0951822	4.76683e-47
628	Glucose, post OGTT	GENDER	-10.5389	1.52531	5.92653e-12		628	Glucose, post OGTT	GENDER	-14.5926	2.07196	2.32763e-12
629	Glucose, post OGTT	log(WEIGHT_FINAL_NORM_OVERALL)	-0.0463356	1.05909	0.965106		629	Glucose, post OGTT	log(WEIGHT_FINAL_NORM_OVERALL)	-0.481232	1.43867	0.738027
630	Glucose, post OGTT	CENTERC	-3.40137	4.23918	0.422407		630	Glucose, post OGTT	CENTERC	-3.6387	5.75848	0.52751
631	Glucose, post OGTT	CENTERM	-5.90848	9.31847	0.52609		631	Glucose, post OGTT	CENTERM	-5.17538	12.6581	0.682673
632	Glucose, post OGTT	CENTERS	-4.57701	4.31217	0.288586		632	Glucose, post OGTT	CENTERS	-5.28609	5.85762	0.366901
633	Glucose, post OGTT	Education2	-4.86618	1.86402	0.00908391		633	Glucose, post OGTT	Education2	-6.98218	2.53207	0.00585995
634	Glucose, post OGTT	Education3	-5.35569	1.8111	0.00312935		634	Glucose, post OGTT	Education3	-7.50634	2.46018	0.00229986
635	Glucose, post OGTT	US_BORN	0.664027	2.33698	0.776324		635	Glucose, post OGTT	US_BORN	0.80642	3.17454	0.799492
636	Glucose, post OGTT	num_us_parents	-0.347804	2.08209	0.867346		636	Glucose, post OGTT	num_us_parents	-0.0848417	2.8283	0.976071
637	Urine creatinine, random	AI	-4.75311	8.37206	0.57025		637	Urine creatinine, random	AI	-4.93975	6.33969	0.435926
638	Urine creatinine, random	birth_year	0.964517	0.112175	1.18884e-17		638	Urine creatinine, random	birth_year	0.737048	0.0849442	6.06234e-18
639	Urine creatinine, random	GENDER	37.2038	2.52299	7.91993e-48		639	Urine creatinine, random	GENDER	27.0121	1.91052	3.28271e-44
640	Urine creatinine, random	log(WEIGHT_FINAL_NORM_OVERALL)	-0.0664785	1.7373	0.969478		640	Urine creatinine, random	log(WEIGHT_FINAL_NORM_OVERALL)	-0.2758	1.31556	0.833957
641	Urine creatinine, random	CENTERC	3.60942	7.21578	0.616956		641	Urine creatinine, random	CENTERC	0.689602	5.4641	0.899576
642	Urine creatinine, random	CENTERM	-22.5038	15.8871	0.156721		642	Urine creatinine, random	CENTERM	-18.318	12.0304	0.127937
643	Urine creatinine, random	CENTERS	-12.7773	7.34269	0.0819208		643	Urine creatinine, random	CENTERS	-11.1141	5.5602	0.0456982
644	Urine creatinine, random	Education2	1.4937	3.08575	0.628369		644	Urine creatinine, random	Education2	0.289105	2.33666	0.901539
645	Urine creatinine, random	Education3	4.02668	2.99848	0.179386		645	Urine creatinine, random	Education3	3.13542	2.27058	0.167398
646	Urine creatinine, random	US_BORN	17.4915	3.92443	8.56094e-06		646	Urine creatinine, random	US_BORN	12.6498	2.97175	2.12771e-05
647	Urine creatinine, random	num_us_parents	-2.76558	3.44955	0.422766		647	Urine creatinine, random	num_us_parents	-1.9857	2.61215	0.447197
648	Predicted FVC	AI	-647.601	37.8247	3.57758e-63		648	Predicted FVC	AI	-46.8489	3.39776	3.71323e-42
649	Predicted FVC	birth_year	26.474	0.508103	0		649	Predicted FVC	birth_year	1.88777	0.0456424	7.16326e-305
650	Predicted FVC	GENDER	1336.97	11.3496	0		650	Predicted FVC	GENDER	84.1418	1.01953	0
651	Predicted FVC	log(WEIGHT_FINAL_NORM_OVERALL)	-15.3968	7.8124	0.0488239		651	Predicted FVC	log(WEIGHT_FINAL_NORM_OVERALL)	-1.14663	0.701781	0.102373
652	Predicted FVC	CENTERC	42.6307	32.8983	0.195119		652	Predicted FVC	CENTERC	3.50706	2.95523	0.235414
653	Predicted FVC	CENTERM	48.9754	72.0969	0.496993		653	Predicted FVC	CENTERM	6.32161	6.47641	0.329083
654	Predicted FVC	CENTERS	89.6044	33.4828	0.00748231		654	Predicted FVC	CENTERS	6.99551	3.00773	0.0200837
655	Predicted FVC	Education2	61.3927	13.8804	1.00306e-05		655	Predicted FVC	Education2	4.91573	1.24686	8.22205e-05
656	Predicted FVC	Education3	86.8295	13.4897	1.3866e-10		656	Predicted FVC	Education3	6.19319	1.21177	3.37836e-07
657	Predicted FVC	US_BORN	16.2535	17.7901	0.360977		657	Predicted FVC	US_BORN	2.34286	1.59807	0.142724
658	Predicted FVC	num_us_parents	28.6743	15.5434	0.065152		658	Predicted FVC	num_us_parents	1.56375	1.39625	0.262804
659	Creatinine	AI	-0.0829412	0.0452158	0.0666856		659	Creatinine	AI	-40.3126	5.42305	1.31361e-13
660	Creatinine	birth_year	-0.00326129	0.000605295	7.58371e-08		660	Creatinine	birth_year	-0.657384	0.0725974	2.1821e-19
661	Creatinine	GENDER	0.245282	0.0136151	1.51859e-69		661	Creatinine	GENDER	64.2947	1.63296	2.38027e-282
662	Creatinine	log(WEIGHT_FINAL_NORM_OVERALL)	0.0227175	0.00936557	0.0153304		662	Creatinine	log(WEIGHT_FINAL_NORM_OVERALL)	4.89858	1.12328	1.33113e-05
663	Creatinine	CENTERC	0.0715059	0.038833	0.0656494		663	Creatinine	CENTERC	15.6279	4.65752	0.000800691
664	Creatinine	CENTERM	0.0568062	0.0857747	0.50784		664	Creatinine	CENTERM	12.9821	10.2876	0.207059
665	Creatinine	CENTERS	0.0585269	0.0395202	0.138712		665	Creatinine	CENTERS	7.48194	4.73995	0.114542
666	Creatinine	Education2	-0.01129	0.0166579	0.497969		666	Creatinine	Education2	2.41191	1.99791	0.227428
667	Creatinine	Education3	-0.00478711	0.0161806	0.767357		667	Creatinine	Education3	4.3937	1.94065	0.0236313
668	Creatinine	US_BORN	0.0073437	0.0211795	0.72881		668	Creatinine	US_BORN	3.68269	2.54021	0.147213
669	Creatinine	num_us_parents	0.0241943	0.0186305	0.194149		669	Creatinine	num_us_parents	3.16265	2.23449	0.157043
670	Red blood cell count	AI	-0.0229319	0.0397992	0.564524		670	Red blood cell count	AI	-2.24844	5.48437	0.681851
671	Red blood cell count	birth_year	0.00407683	0.000532176	2.36501e-14		671	Red blood cell count	birth_year	0.532986	0.0733343	4.46034e-13
672	Red blood cell count	GENDER	0.52147	0.0119731	0		672	Red blood cell count	GENDER	67.2604	1.64991	8.21772e-299
673	Red blood cell count	log(WEIGHT_FINAL_NORM_OVERALL)	-0.0160083	0.00824929	0.0523893		673	Red blood cell count	log(WEIGHT_FINAL_NORM_OVERALL)	-1.93769	1.13676	0.0883603
674	Red blood cell count	CENTERC	0.0138179	0.0341647	0.685906		674	Red blood cell count	CENTERC	2.19067	4.70792	0.641734
675	Red blood cell count	CENTERM	0.0976046	0.0752159	0.194488		675	Red blood cell count	CENTERM	15.2052	10.3648	0.142463
676	Red blood cell count	CENTERS	0.00928319	0.0347836	0.789574		676	Red blood cell count	CENTERS	1.67917	4.79321	0.726118
677	Red blood cell count	Education2	0.00670598	0.0146452	0.647054		677	Red blood cell count	Education2	0.794007	2.01812	0.694018
678	Red blood cell count	Education3	-0.0121964	0.0142089	0.39075		678	Red blood cell count	Education3	-1.44017	1.958	0.462064
679	Red blood cell count	US_BORN	-0.00830678	0.0185775	0.6548		679	Red blood cell count	US_BORN	-0.494783	2.56	0.846755
680	Red blood cell count	num_us_parents	0.00463973	0.0163651	0.7768		680	Red blood cell count	num_us_parents	-0.0680005	2.25513	0.975946
681	Albumin/creatine ratio	AI	107.026	47.6849	0.0248676		681	Albumin/creatine ratio	AI	37.1041	6.59476	1.98769e-08
682	Albumin/creatine ratio	birth_year	-1.86738	0.634066	0.00325016		682	Albumin/creatine ratio	birth_year	-0.924771	0.0876905	1.29549e-25
683	Albumin/creatine ratio	GENDER	9.24596	14.341	0.519151		683	Albumin/creatine ratio	GENDER	-20.6984	1.98335	3.99415e-25
684	Albumin/creatine ratio	log(WEIGHT_FINAL_NORM_OVERALL)	1.14983	9.86775	0.907244		684	Albumin/creatine ratio	log(WEIGHT_FINAL_NORM_OVERALL)	0.10529	1.3647	0.938507
685	Albumin/creatine ratio	CENTERC	29.0319	40.8113	0.476904		685	Albumin/creatine ratio	CENTERC	0.241324	5.64415	0.965898
686	Albumin/creatine ratio	CENTERM	18.5051	88.8896	0.8351		686	Albumin/creatine ratio	CENTERM	6.74234	12.2933	0.583414
687	Albumin/creatine ratio	CENTERS	28.8563	41.5769	0.4877		687	Albumin/creatine ratio	CENTERS	4.30689	5.75003	0.453895
688	Albumin/creatine ratio	Education2	-15.3122	17.5728	0.383619		688	Albumin/creatine ratio	Education2	-2.18668	2.43029	0.368311
689	Albumin/creatine ratio	Education3	-25.1236	17.0945	0.141737		689	Albumin/creatine ratio	Education3	-5.75285	2.36414	0.015009
690	Albumin/creatine ratio	US_BORN	28.228	22.2958	0.205574		690	Albumin/creatine ratio	US_BORN	10.2125	3.08348	0.000935841
691	Albumin/creatine ratio	num_us_parents	49.6128	19.7218	0.011927		691	Albumin/creatine ratio	num_us_parents	1.0493	2.7275	0.700474
692	QTc calculated	AI	0.28492	2.53167	0.9104		692	QTc calculated	AI	0.427413	6.20566	0.945093
693	QTc calculated	birth_year	-0.412922	0.033798	1.16489e-33		693	QTc calculated	birth_year	-0.974353	0.0828459	2.32439e-31
694	QTc calculated	GENDER	-17.5077	0.761564	3.37673e-109		694	QTc calculated	GENDER	-37.3545	1.86676	1.59434e-84
695	QTc calculated	log(WEIGHT_FINAL_NORM_OVERALL)	0.543096	0.522971	0.299115		695	QTc calculated	log(WEIGHT_FINAL_NORM_OVERALL)	1.23817	1.28191	0.33417
696	QTc calculated	CENTERC	2.33981	2.16499	0.279882		696	QTc calculated	CENTERC	5.14463	5.30684	0.332395
697	QTc calculated	CENTERM	3.59802	4.77759	0.451438		697	QTc calculated	CENTERM	9.95873	11.7109	0.395169
698	QTc calculated	CENTERS	-5.43959	2.20307	0.0135917		698	QTc calculated	CENTERS	-12.2616	5.40018	0.0232314
699	QTc calculated	Education2	-1.23353	0.930942	0.185246		699	QTc calculated	Education2	-3.05465	2.28194	0.180778
700	QTc calculated	Education3	-0.0338264	0.904957	0.970185		700	QTc calculated	Education3	-0.582251	2.21824	0.792964
701	QTc calculated	US_BORN	2.33243	1.18108	0.0483644		701	QTc calculated	US_BORN	6.64854	2.89507	0.0217046
702	QTc calculated	num_us_parents	2.37731	1.04059	0.0223951		702	QTc calculated	num_us_parents	6.15955	2.5507	0.0157915
703	HRV	AI	-5.99711	3.2497	0.0650597		703	HRV	AI	-10.0724	6.24868	0.107069
704	HRV	birth_year	0.806808	0.0436373	7.33368e-73		704	HRV	birth_year	1.77054	0.0839079	4.47182e-93
705	HRV	GENDER	-4.16504	0.978614	2.1358e-05		705	HRV	GENDER	-10.0505	1.88173	9.8355e-08
706	HRV	log(WEIGHT_FINAL_NORM_OVERALL)	0.629242	0.671152	0.348539		706	HRV	log(WEIGHT_FINAL_NORM_OVERALL)	1.11409	1.29052	0.388042
707	HRV	CENTERC	-0.991817	2.7889	0.722139		707	HRV	CENTERC	-5.74672	5.36263	0.283964
708	HRV	CENTERM	-7.8962	6.15638	0.199716		708	HRV	CENTERM	-17.1158	11.8378	0.148307
709	HRV	CENTERS	1.82325	2.83988	0.520904		709	HRV	CENTERS	1.08377	5.46065	0.84269
710	HRV	Education2	0.366228	1.19213	0.758707		710	HRV	Education2	2.36807	2.29229	0.30165
711	HRV	Education3	-1.141	1.16539	0.32761		711	HRV	Education3	-0.144913	2.24086	0.948442
712	HRV	US_BORN	0.152879	1.51466	0.919609		712	HRV	US_BORN	-3.38341	2.91246	0.245437
713	HRV	num_us_parents	-0.996683	1.33623	0.455783		713	HRV	num_us_parents	-3.07251	2.56937	0.231847
714	% Immature granulocytes	AI	0.113763	0.112094	0.31061		714	% Immature granulocytes	AI	14.4319	15.3416	0.347275
715	% Immature granulocytes	birth_year	-0.001213	0.00167558	0.469421		715	% Immature granulocytes	birth_year	-0.232561	0.229326	0.310984
716	% Immature granulocytes	GENDER	0.0312826	0.0345834	0.366102		716	% Immature granulocytes	GENDER	7.6529	4.73323	0.106492
717	% Immature granulocytes	log(WEIGHT_FINAL_NORM_OVERALL)	-0.0276701	0.0247663	0.264382		717	% Immature granulocytes	log(WEIGHT_FINAL_NORM_OVERALL)	-2.77424	3.38962	0.413458
718	% Immature granulocytes	CENTERC	0.353578	0.0831752	2.50526e-05		718	% Immature granulocytes	CENTERC	43.9492	11.3837	0.000126671
719	% Immature granulocytes	CENTERM	0.584073	0.283426	0.0398015		719	% Immature granulocytes	CENTERM	43.2979	38.7908	0.264835
720	% Immature granulocytes	CENTERS	-0.207302	0.0818389	0.011588		720	% Immature granulocytes	CENTERS	-29.4551	11.2008	0.00878754
721	% Immature granulocytes	Education2	0.0569752	0.0431454	0.187211		721	% Immature granulocytes	Education2	6.26557	5.90506	0.289138
722	% Immature granulocytes	Education3	0.0419732	0.0405942	0.30161		722	% Immature granulocytes	Education3	5.13872	5.55589	0.355422
723	% Immature granulocytes	US_BORN	-0.036079	0.0533387	0.499067		723	% Immature granulocytes	US_BORN	-2.49659	7.30016	0.732489
724	% Immature granulocytes	num_us_parents	0.0431851	0.0476168	0.364846		724	% Immature granulocytes	num_us_parents	4.50839	6.51703	0.489367
725	Average diastolic blood pressure	AI	-1.82383	1.17207	0.119779		725	Average diastolic blood pressure	AI	-9.56096	6.49861	0.141316
726	Average diastolic blood pressure	birth_year	-0.115342	0.0156763	2.30523e-13		726	Average diastolic blood pressure	birth_year	-0.620884	0.0869179	1.09726e-12
727	Average diastolic blood pressure	GENDER	4.30474	0.352819	1.40194e-33		727	Average diastolic blood pressure	GENDER	22.7631	1.95622	9.50817e-31
728	Average diastolic blood pressure	log(WEIGHT_FINAL_NORM_OVERALL)	-0.766629	0.242555	0.0015873		728	Average diastolic blood pressure	log(WEIGHT_FINAL_NORM_OVERALL)	-4.1755	1.34485	0.00191892
729	Average diastolic blood pressure	CENTERC	-0.366587	1.0055	0.715446		729	Average diastolic blood pressure	CENTERC	-1.40085	5.57505	0.801619
730	Average diastolic blood pressure	CENTERM	3.42573	2.2559	0.12896		730	Average diastolic blood pressure	CENTERM	18.5059	12.5079	0.139084
731	Average diastolic blood pressure	CENTERS	0.328491	1.02336	0.748234		731	Average diastolic blood pressure	CENTERS	2.48788	5.67404	0.661074
732	Average diastolic blood pressure	Education2	-0.04528	0.431611	0.916454		732	Average diastolic blood pressure	Education2	-0.493743	2.39308	0.836552
733	Average diastolic blood pressure	Education3	-0.216991	0.419152	0.604707		733	Average diastolic blood pressure	Education3	-1.36816	2.32401	0.556095
734	Average diastolic blood pressure	US_BORN	0.134287	0.548334	0.806548		734	Average diastolic blood pressure	US_BORN	0.513527	3.04026	0.865878
735	Average diastolic blood pressure	num_us_parents	1.34327	0.482291	0.00537765		735	Average diastolic blood pressure	num_us_parents	8.00366	2.67408	0.00278084
736	% Glycosylated hemoglobin	AI	0.868941	0.150469	8.35505e-09		736	% Glycosylated hemoglobin	AI	42.7147	6.09273	2.81906e-12
737	% Glycosylated hemoglobin	birth_year	-0.0261242	0.00201095	9.62979e-38		737	% Glycosylated hemoglobin	birth_year	-1.69827	0.0814264	2.78338e-91
738	% Glycosylated hemoglobin	GENDER	0.0916602	0.0452666	0.0429516		738	% Glycosylated hemoglobin	GENDER	1.04812	1.83291	0.567472
739	% Glycosylated hemoglobin	log(WEIGHT_FINAL_NORM_OVERALL)	-0.0470691	0.0311305	0.130623		739	% Glycosylated hemoglobin	log(WEIGHT_FINAL_NORM_OVERALL)	-2.98126	1.26052	0.0180778
740	% Glycosylated hemoglobin	CENTERC	0.103702	0.128882	0.421088		740	% Glycosylated hemoglobin	CENTERC	3.30283	5.21864	0.526845
741	% Glycosylated hemoglobin	CENTERM	0.148584	0.284606	0.601653		741	% Glycosylated hemoglobin	CENTERM	0.393383	11.5241	0.972771
742	% Glycosylated hemoglobin	CENTERS	0.0490886	0.131191	0.708296		742	% Glycosylated hemoglobin	CENTERS	0.922422	5.31214	0.862155
743	% Glycosylated hemoglobin	Education2	-0.0728978	0.0553891	0.188223		743	% Glycosylated hemoglobin	Education2	-4.91602	2.24279	0.0284489
744	% Glycosylated hemoglobin	Education3	-0.103683	0.0537674	0.0538896		744	% Glycosylated hemoglobin	Education3	-5.85014	2.17712	0.00724083
745	% Glycosylated hemoglobin	US_BORN	0.138541	0.0703452	0.0489791		745	% Glycosylated hemoglobin	US_BORN	4.77958	2.84838	0.0934348
746	% Glycosylated hemoglobin	num_us_parents	-0.00139123	0.0618398	0.982052		746	% Glycosylated hemoglobin	num_us_parents	1.88007	2.50399	0.452804
747	Urine microalbumin, random	AI	89.5341	36.0277	0.0129968		747	Urine microalbumin, random	AI	30.3006	6.73621	7.07979e-06
748	Urine microalbumin, random	birth_year	-1.64656	0.479061	0.000594999		748	Urine microalbumin, random	birth_year	-0.425988	0.0895714	2.05694e-06
749	Urine microalbumin, random	GENDER	19.2697	10.8352	0.07542		749	Urine microalbumin, random	GENDER	2.39985	2.02589	0.23626
750	Urine microalbumin, random	log(WEIGHT_FINAL_NORM_OVERALL)	5.15233	7.45545	0.48956		750	Urine microalbumin, random	log(WEIGHT_FINAL_NORM_OVERALL)	-0.455625	1.39397	0.743798
751	Urine microalbumin, random	CENTERC	21.5711	30.8344	0.484238		751	Urine microalbumin, random	CENTERC	1.4899	5.76521	0.79609
752	Urine microalbumin, random	CENTERM	-1.43965	67.1593	0.982899		752	Urine microalbumin, random	CENTERM	-9.22618	12.557	0.462545
753	Urine microalbumin, random	CENTERS	12.7815	31.4129	0.684115		753	Urine microalbumin, random	CENTERS	-2.50291	5.87336	0.670028
754	Urine microalbumin, random	Education2	-7.0526	13.2769	0.595319		754	Urine microalbumin, random	Education2	-0.674231	2.48242	0.785944
755	Urine microalbumin, random	Education3	-12.7144	12.9155	0.324973		755	Urine microalbumin, random	Education3	-2.82114	2.41485	0.242787
756	Urine microalbumin, random	US_BORN	24.1049	16.8453	0.152533		756	Urine microalbumin, random	US_BORN	16.2942	3.14962	2.42963e-07
757	Urine microalbumin, random	num_us_parents	30.0506	14.9005	0.0437997		757	Urine microalbumin, random	num_us_parents	0.963798	2.786	0.729406
