# Supplementary material for: Recent shifts in the genomic ancestry of Mexican Americans may alter the genetic architecture of biomedical traits
Source: eLife. 2020 Dec 29;9:e56029. doi: 10.7554/eLife.56029 (PMC7771964; doi:10.7554/eLife.56029)
Supplement: Supplementary file 4. — Height (cm) as a function of birth year adjusting by center, gender, sampling weight, educational attainment, US-born status, and number of US-born parents for 3604 Mexican Americans stratified by the quartiles of global Amerindigenous ancestry (AI). [file elife-56029-supp4.xlsx]

## Sheet: Sheet1
Group	N	R2	Effect	Std.Err	P
All	3604	0.557138	0.0955815	0.00962364	5.95001e-23
AI>0.58	922	0.585209	0.135082	0.0195274	8.61456e-12
0.46<=AI<=0.58	948	0.594005	0.124383	0.0180757	1.08063e-11
0.37<=AI<0.46	836	0.561184	0.0833514	0.018436	7.04442e-06
AI<0.37	882	0.541836	0.112803	0.0196126	1.22072e-08
