# Supplementary material for: Recent shifts in the genomic ancestry of Mexican Americans may alter the genetic architecture of biomedical traits
Source: eLife. 2020 Dec 29;9:e56029. doi: 10.7554/eLife.56029 (PMC7771964; doi:10.7554/eLife.56029)
Supplement: Supplementary file 5. — Predicted height (cm) as a function of observed height (cm) adjusting by center, gender, sampling weight, educational attainment, US-born status, and number of US-born parents for 3604 Mexican Americans stratified by Amerindigenous ancestry (AI). [file elife-56029-supp5.xlsx]

## Sheet: Sheet1
Group	X	N	R2	Effect	Std.Err	P
All	Observed Height	3604	0.0110466	0.00373671	0.000699847	9.90718e-08
AI>0.58	Observed Height	922	0.00744374	0.00252542	0.00144302	0.080436
0.46<=AI<=0.58	Observed Height	948	0.00829157	0.000676803	0.00147569	0.646603
0.37<=AI<0.46	Observed Height	836	0.0265443	0.00610905	0.00148696	4.3781e-05
AI<0.37	Observed Height	882	0.018811	0.00489837	0.00138889	0.000442383
